# Supplementary material for: Internal tides off the Amazon shelf Part I : importance for the structuring of ocean temperature during two contrasted seasons
Source: Copernicus journal article supplement (doi:10.5194/egusphere-2023-418), 2023-03-23
Supplement: Supplementary file [file egusphere-2023-418-RC2-supplement.pdf]

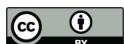

# 1 **Internal tides off the Amazon shelf Part I: importance for the** 2 **structuring of ocean temperature during two contrasted seasons**

3 Fernand Assene <sup>1</sup>, Ariane Koch-Larrouy <sup>2</sup>, Isabelle Dadou <sup>3</sup>, Michel Tchilibou <sup>4</sup>, Guillaume  
4 Morvan <sup>5</sup>, Jérôme Chanut <sup>6</sup>, Vincent Vantrepotte <sup>7</sup>, Damien Allain <sup>8</sup>, Trung-Kien Tran <sup>9</sup>.

5 <sup>1, 2, 3, 5, 8</sup> Université de Toulouse, LEGOS (CNRS/IRD/UPS/CNES), Toulouse, France, <sup>1, 6</sup> Mercator  
6 Ocean International, 31400 Toulouse, France, <sup>4</sup> Collecte Localisation Satellites (CLS), 31500  
7 Ramonville Saint-Agne, France, <sup>7, 9</sup> Laboratoire d'Océanologie et de Géosciences (LOG), 62930  
8 Wiméreaux, France

9 Correspondence to: Fernand Assene ([assene@legos.obs-mip.fr](mailto:assene@legos.obs-mip.fr))

## 10 **Abstract**

11 Tides and internal tides (IT) in the ocean can significantly affect local to regional ocean  
12 temperature, including sea surface temperature (SST), via physical processes such as diffusion  
13 (vertical mixing) and advection (vertical and horizontal) of water masses. Offshore of the  
14 Amazon River, strong ITs have been detected by satellite observations and well modelled;  
15 however, their impact on temperature, SST and the identification of the associated processes  
16 have not been studied so far. In this work, we use ~~high-resolution (1/36°)~~ numerical simulations  
17 with and without the tides from an ocean circulation model (NEMO). This model explicitly  
18 resolves the internal tides (IT) and is therefore suitable to assess how they can affect ocean  
19 temperature in the studied area. We distinguish the analysis for two contrasted seasons, from  
20 April to June (AMJ) and from August to October (ASO), since the seasonal stratification off  
21 the Amazon River modulates the IT's response and their influence in temperature.

22 The generation and the propagation of the IT in the model are in good agreement with  
23 observations. The SST reproduced by the simulation including tides is in better agreement with  
24 satellite SST data compared to the simulation without tides. During ASO season, stronger  
25 meso-scale currents, deeper and weaker pycnocline are observed in contrast to the AMJ season.  
26 The observed coastal upwelling during ASO season is better reproduced by the model including  
27 tides, whereas the no-tide simulation is too warm by +0.3 °C for the SST. ~~In the subsurface~~  
28 ~~above the thermocline, the tide simulation is cooler by -1.2 °C, and warmer below the~~  
29 ~~thermocline by +1.2 °C compared to the simulation without the tides.~~ The ITs induce vertical  
30 mixing on their generation site along the shelf break and on their propagation pathways towards  
31 the open ocean. This process mainly explains the cooler temperature at the ocean surface and  
32 is combined with vertical and horizontal advection to explain the cooling in the subsurface

"The internal  
tide (IT)"  
or  
"Internal Tides  
(ITs)"

Abstract  
seems long,  
careful about  
word limits

Confused

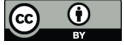

*induces (you've been writing in the present tense so far)*

33 water above the thermocline and a warming in the deeper layers below the thermocline. The  
34 surface cooling induced in turn an increase of the net heat flux from the atmosphere to the  
35 ocean surface, which could induce significant changes in the local and even for the regional  
36 tropical Atlantic atmospheric circulation and precipitation.

37 We therefore demonstrate that IT via vertical mixing and advection along their  
38 propagation pathways, and tides over the continental shelf, can play a role on the temperature  
39 structure off the Amazon River mouth, particularly in the coastal cooling enhanced by the IT.

40 **Keywords:** internal tides, Amazon continental shelf and slope, temperature, modeling, satellite  
41 data, mixing, heat flux.

## 42 I. Introduction

43 Temperature and its spatial structure play a crucial role in ocean dynamics, including  
44 water mass formation (Swift and Aagaard, 1981; Lascaratos 1993; Speer et al. 1995), transport  
45 and mixing of other tracers in the ocean and exchanges with other biosphere compartments  
46 (Archer et al. 2004, Rosenthal et al. 1997), and most importantly on surface heat exchange at  
47 the interface with the atmosphere (Calyson and Bagdanoff, 2013; Mei et al. 2015) and can thus  
48 significantly influence the climate (Li et al. 2006; Collins et al. 2010). This oceanic thermal  
49 structure can be modified at various spatial and temporal scales by different processes external  
50 to the ocean such as incident solar radiation, heat fluxes with the atmosphere, winds,  
51 precipitation and freshwater inputs from rivers. Processes internal to the ocean also play a  
52 crucial role in this thermal structure, such as mass transport by currents and eddies (e.g.:  
53 Aguedjou et al., 2021), mixing by turbulent diffusion (Kunze et al. 2012), tides and internal  
54 tidal waves (IT) (Barton et al., 2001; Smith et al., 2016; Salamena et al., 2021). The role of IT  
55 on the thermal structure of the ocean is of increasing interest with many studies in recent years,  
56 but remains poorly understood in many ocean regions, and especially off the Amazon shelf.

57 In a stratified ocean, the passage of a barotropic tide over a topographic profile with a  
58 steep slope (continental slope, seamount, oceanic ridge) generates a disturbance in the flow  
59 that gives rise to a so-called baroclinic tide, with the same frequency, but with higher vertical  
60 velocities (Zhao et al., 2016). The baroclinic tide, also known as internal tidal waves (IT), thus  
61 captures part of the energy of the barotropic tide, propagates it and dissipates it into the global  
62 ocean by diapycnal mixing (Zhao et al., 2012), i.e., up to about 1 TW in the deep ocean (Egbert  
63 and Ray, 2000; Niwa and Hibiya, 2011) and thus helps to feed the thermohaline circulation  
64 (Munk and Wunsch, 1998). These two tidal processes (barotropic tide and IT) thus bring

*Diapycnal mixing only a fraction of total dissipation*

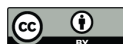

65 together a set of mechanisms for transferring and redistributing energy from larger to smaller  
66 oceanic scales, which can be understood as a tidal energy cascade. The dissipation of IT occurs  
67 mainly locally at the generation sites for high-mode IT that are associated with higher vertical  
68 shear, while a significant part of the energy dissipates offshore along their propagation path for  
69 low-mode IT (Zhao et al., 2016). Results from models in the Indonesian seas (Koch-Larrouy  
70 et al., 2007 and Nugroho et al., 2018) and observations in the Celtic Sea (Sharples et al. 2007)  
71 and the Yellow Sea (Xu et al., 2020), point out that ITs dissipate most of their energy vertically,  
72 where the vertical gradient of stratification is maximal in the water column. IT can also  
73 vertically advect water masses during their propagation. They thus induce vertical  
74 displacements of the isopycnal levels of several meters to a few tens of meters, observable in  
75 the thermocline (Wallace et al., 2008; Xu et al. 2020). Denmann and Garrett (1983) and Bordois  
76 et al. (2016) point out that the stratification peak acts as a waveguide for the propagation of ITs

77 The mixing and advection induced by ITs results in a change in temperature structure  
78 throughout the water column. In surface waters, Smith et al. (2016) report that ITs can induce  
79 surface cooling varying between 1 °C and 5 °C depending on the ocean region. Koch-Larrouy  
80 et al. (2007) and Nagai and Hibiya (2015) have shown, for the Indonesian region, that ITs  
81 induces a surface cooling of -0.5 °C on average and that this decreases cloud convection in the  
82 atmosphere on a local scale, which in turn reduces precipitation by 20% and thus plays an  
83 important role on the climate on a regional scale. Furthermore, Jithin and Francis (2020)  
84 showed that ITs can also affect the temperature in deep waters (> 1600 m), leading to a warming  
85 of the order of 1–2 °C.

86 The barotropic tides dissipate most of their energy in shallow coastal waters by bottom  
87 friction when the mean ocean depth becomes less than the amplitude of the tide (Lambeck and  
88 Runcorn, 1977; Le Provost and Lyard, 1997), and can thus modify temperature. Furthermore,  
89 Gonzalez-Haro et al. (2019) showed that barotropic and baroclinic tidal currents can induce  
90 temperature fluctuations by horizontal advection of surface water masses over hundreds of  
91 kilometers, and thus contribute to modifying the SST. These two tidal processes (barotropic  
92 and baroclinic) can also affect other tracers such as nutrients, chlorophyll and sediments  
93 (Heathershaw et al., 1987; da Silva et al., 2002; Sharples et al., 2007; Pomar et al., 2012;  
94 Muacho et al., 2014; Tuarena et al., 2016; Barbot et al., 2022).

95 Our study focuses on the oceanic region of northern Brazil off the Amazon River, where  
96 ITs have been highlighted in previous studies, but their impact on the thermal structure is not  
97 currently known. This region is characterized by a broad, shallow continental shelf at the mouth

High-frequency  
↓  
Did not read Bordois but my PhD was about this and I think you need to add it.

The connection is unclear. Consider deleting

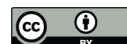

98 of the Amazon River ended by a steep slope, i.e., a bathymetry variation of 200-2000 m over  
99 some tens of kilometers (Fig.1). Along this slope, six sites (A to F) of IT generation have been  
100 identified (Fig.1), the most intense of which (A and B) are in the south of the region (Magalhaes  
101 et al. 2016, Barbot et al. 2021 and Tchilibou et al. 2022). A strong seasonal coastal current, the  
102 Brazilian North Current (NBC), strongly influences the study area and flows along the coast  
103 from the southeast to the northwest (Johns et al., 1990).

104 This region shows a seasonal variation in the position of the winds and the Intertropical  
105 Convergence Zone (ITCZ) during the year, which directly influences the discharge of the  
106 Amazon River, the oceanic circulation (Xie and Carton, 2004), and therefore the stratification.  
107 This impacts the activity of internal tidal waves (Barbot et al., 2021). Two seasons can be  
108 clearly distinguished by their properties on water masses and currents.

109 The first season runs from March to July, during this time the ITCZ is in its most  
110 equatorial position and lies in the heart of our region. The increase in rainfall over the ocean  
111 leads to a colder and more homogeneous SST far from the coast. The discharge of the Amazon  
112 River into the ocean reaches its peak ( $> 3 \times 10^5 \text{ m}^3 \cdot \text{s}^{-1}$ ) and the surface temperature in the coastal  
113 zone, although homogeneous, is warmer than offshore. At the end of this season, driven by the  
114 strong river discharge, the Amazon plume along the shelf extends beyond  $8^\circ\text{N}$ , and sometimes  
115 into the Caribbean region (Müller-Karger et al., 1989; Johns et al., 1998). The stratification is  
116 somewhat stronger and more homogeneous horizontally, and the maximum of its vertical  
117 gradient (pycnocline) is closer to the surface. This latter point leads to a stronger conversion of  
118 energy from barotropic to baroclinic, and a stronger local (first 50 km) dissipation of internal  
119 tidal wave energy (Barbot et al., 2021; Tchilibou et al., 2022). NBC and eddy kinetic energy  
120 (EKE) are weak in the region (Aguedjou et al., 2019). Close to the equator, the NBC develops  
121 a retroflection towards  $1^\circ\text{N}$  latitude that feeds the Equatorial Under-Current (EUC) transporting  
122 water masses eastwards to the Gulf of Guinea (Didden and Schott, 1993, Dimoune et al., 2022).

123 Contrasting with this first season, due to different oceanic and atmospheric conditions,  
124 the second season extends from August to December. During this season, the ITCZ migrates  
125 to its northernmost position around  $10^\circ\text{N}$ . In response, rainfall in this area decreases and the  
126 Amazon River discharge also decreases to its minimum ( $\sim 10^5 \text{ m}^3 \cdot \text{s}^{-1}$ ), the extension of the river  
127 plume is therefore reduced to no more than 200–300 km offshore from the mouth of the  
128 Amazon between November and December (Johns et al., 1998, Garzoli et al., 2003). During  
129 this season, cold water ( $< 27.6^\circ\text{C}$ ) associated with the western extension of the Atlantic cold-  
130 water tongue (ACT) enters the region from the south and runs along the edge of the continental



131 shelf to about 3°N (Lentz and Limeburner, 1995; Neto et al., 2014), forming a cold cell often  
132 referenced as a seasonal upwelling. The stratification of the study area is strongly modified  
133 compared to the previous season. The pycnocline becomes somewhat deeper. The generation  
134 of IT on the slope and their local dissipation are weaker compared to the first season (Barbot  
135 et al., 2021; Tchilibou et al., 2022). Currents and eddy activity become stronger. The NBC  
136 becomes stronger, farther from the coast and deeper, it develops a retroflection (NBCR)  
137 between 5°–8° N that feeds the North Equatorial Counter-Current (NECC) transporting the  
138 water masses towards the east of the tropical Atlantic. This generates very large anticyclonic  
139 eddies (NBC Rings) exceeding 450 km in diameter (Didden and Schott, 1993; Richardson et  
140 al., 1994; Garzoli et al., 2004), which in turn transport water masses towards the Northern  
141 Hemisphere (Bourlès et al., 1999a; Johns et al., 1998; Schott et al., 2003). In addition, there are  
142 more cyclonic/anticyclonic eddies from the Gulf of Guinea during this season. All this  
143 contributes to the strengthening of the EKE, which reaches its maximum in this season  
144 (Aguedjou et al., 2019). When the baroclinic tidal flow interacts with the general circulation,  
145 it is deviated from its trajectory, thus we have a so-called incoherent baroclinic tide (Buijsman  
146 et al., 2017). This IT-circulation interaction is thus reinforced during this second season  
147 because of the more intensified currents and eddy activity (Tchilibou et al., 2022).

148 On the Brazilian continental shelf, Geyer et al. (1996) suggests the presence of internal  
149 tidal waves from current data. Later, Lentini et al. (2016) based on SAR imagery, shows small-  
150 wavelength (~ 10 km) internal solitary waves (ISW) packets propagating along and across the  
151 continental shelf, and generated by linear non-hydrostatic interactions between the NBC and  
152 barotropic tidal currents. Using a model, Molinas et al. (2020) show that baroclinic tidal  
153 currents play an important role on sediment transport on this continental shelf. On a global  
154 scale, several studies from altimetry observations (Zhao et al., 2012, 2016; Zaron et al., 2017,  
155 2019) or models (Munk and Wunsch, 1998; Shriver et al., 2012; Arbic et al., 2012; Niwa and  
156 Hibiya, 2011, 2014; Buijsman et al. 2016) have shown intense activity of IT along the steep  
157 slope of the continental shelf. At the surface, using SAR imagery, Jackson (2007) and  
158 Magalhaes et al. (2016) describe longer wavelength ISW (~ 50–150 km) that propagate  
159 offshore from the slope. The latter emphasizes the modulation of their propagation by the  
160 seasonal variation of the NECC, and from a model, establishes that these ISW originate from  
161 instabilities and energy loss of IT coming from the slope, mainly at sites A and B. Recently, de  
162 Macedo et al. (2023) provided a somewhat more comprehensive description of the seasonal  
163 characteristics of these ISW, with the predominant origin remaining at sites A and B. Barbot



164 et al. (2021) focused on the influence of stratification on the IT generation on the shelf as well  
165 as their propagation offshore. Finally, also in seasonal scale, Tchilibou et al. (2022) looked at  
166 the variation of the energy associated with IT from their generation to their dissipation, as well  
167 as the interaction of these waves with the general circulation. However, the interactions  
168 between IT and tracers such as temperature, salinity or chlorophyll have not received much  
169 interest from the scientific community in this region.

170 Hydrodynamic and biogeochemical conditions on the shelf and off the mouth of the  
171 Amazon were studied during the AMASSEDS campaigns in the early 1990s (DeMaster and  
172 Pope, 1996; Nittouer and DeMaster, 1996) and the various “*Camadas Finas*” campaigns  
173 (Araujo et al., 2017, 2021). Furthermore, using data from the two REVIZEE campaigns and  
174 TMI-SST satellite data, Neto et al. (2014) studied the seasonal cooling of surface waters, which  
175 occurs between the months of July and December. They conclude that the NBC is responsible  
176 for the upwelling of cold-water masses ( $< 27.5\text{ }^{\circ}\text{C}$ ) to the more superficial layers. Subsequently,  
177 Araujo et al. (2016), using in addition a realistic model, suggest that the tide would have a key  
178 role to play in intensifying this cooling. Indeed, through twin simulations with and without tides,  
179 they show that with tides there is a  $-0.3\text{ }^{\circ}\text{C}$  cooling of the surface temperature. These analyses  
180 remain qualitative and do not allow determining what are the processes at work. Knowing that  
181 we are in an area with a strong activity of internal tidal waves, the question remains whether  
182 and by what processes these IT can structure the temperature both at the surface and inside the  
183 water column.

184 In order to answer the above questions, we used a high-resolution model ( $1/36^{\circ}$ ) and a  
185 satellite SST product, with the aim of highlighting the impact of IT on the temperature structure  
186 and associated processes. These observations, our modeling, as well as the methods used are  
187 described in section II. The validation of some barotropic and baroclinic tide’s characteristics  
188 as well as SST are present in section III. The impacts of IT on the temperature structure, the  
189 influence on heat exchange at the interface between the atmosphere and the ocean, and finally  
190 the processes involved, are analyzed in section IV. Summary and discussions of the obtained  
191 results are presented in a last section.

192

## 193 II. Data and Methods

### 194 II.1. Satellite Data used: TMI SST

195 This dataset derived from Tropical Rainfall Measurement Mission (TRMM), which  
196 performs measurements using onboard TRMM Microwave Imager (TMI). The microwaves

cannot determine what are the processes at work. Knowing that we are in an area with a strong activity of internal tidal waves, the question remains whether and by what processes these IT can structure the temperature both at the surface and inside the water column. I will stop making notes of it each time.

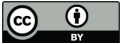

197 can penetrate clouds and are therefore very important for data acquisition in low latitude  
198 regions, cloudy covered during long periods of raining seasons. We use Remote Sensing  
199 Systems (RSS) TMI data products v7.1, which is the latest version of TMI SST. It contains a  
200 daily mean of SST with a  $0.25^\circ \times 0.25^\circ$  grid resolution ( $\sim 25$  km). This SST is obtained by inter-  
201 calibration of TMI data with other microwave radiometers. The TMI SST fully description and  
202 inter-calibration algorithm ~~is~~ <sup>are</sup> detailed in Wentz et al. (2015).

## 203 II.2. Model: *AMAZON36* configuration

204 The numerical model used in this study is the Nucleus for European Modelling of the  
205 Ocean (NEMOv4.0.2, Madec et al., 2019). The “*AMAZON36*” model configuration covers the  
206 western tropical Atlantic region with a  $1/36^\circ$  horizontal grid, from the Amazon River mouth to  
207 the open ocean. Several configurations with same grid resolution, but for the former  
208 NEMOv3.6 (Madec, 2014), exists for the same region, but either <sup>?</sup> includes Caribbean Sea  
209 (Hernandez et al., 2016), or are not far extended to the east even used for tides study (Ruault  
210 et al., 2020). The present configuration is wide <sup>?</sup> to capture, on their pathways, all the internal  
211 tide <sup>radiating</sup> generating from the Brazilian shelf. Hence, the domain lies between  $54.7^\circ\text{W}$ – $35.3^\circ\text{W}$  and  
212  $5.5^\circ\text{S}$ – $10^\circ\text{N}$  (Fig.1). In contrast with former configurations, we do not use multiple nested grids  
213 here, but a single grid. The vertical grid comprises 75 vertically fixed z-coordinates levels, finer  
214 grid refinement close to the surface with 23 levels in the 100 m, and cell thickness <sup>with a</sup> reaching  
215 160 m when approaching the bottom. Both horizontal and vertical grid resolutions are therefore  
216 ~~acceptable~~ <sup>fine enough</sup> to resolve low-mode internal tides and were already used for that purpose (Tchilibou  
217 et al., 2022).

218 A third order upstream biased scheme (UP3) with built-in diffusion is used for  
219 momentum advection, while tracer advection relies on a 2<sup>nd</sup> order Flux Corrected Transport  
220 (FCT) scheme. A Laplacian isopycnal diffusion with a constant coefficient of  $20 \text{ m}^2 \cdot \text{s}^{-1}$  is used  
221 for tracers. The temporal integration is achieved thanks to a leapfrog scheme combined with  
222 an Asselin filter to damp numerical modes (baroclinic time step is 150 s). The  $k$ - $\epsilon$  turbulent  
223 closure scheme is used for the vertical diffusion coefficients. Bottom friction is quadratic with  
224 a bottom drag coefficient of  $2.5 \times 10^{-3}$ , while lateral wall free-slip boundary conditions are  
225 assumed. A time splitting technique is used to resolve the free surface, with the barotropic part  
226 of the dynamical equations integrated explicitly.

227 We use the General Bathymetric Chart of the Oceans (GEBCO, 2020) interpolated onto  
228 the model horizontal grid, with the minimal depth equal to 12.8 m. The ocean model is forced  
229 by the ERA-5 atmospheric reanalysis (Hersbach et al., 2020). The river discharges are based

Implemented! ↖

none include?



230 on monthly means from hydrology simulation of ISBA model (Interaction Sol-Biosphère-  
 231 Atmosphère, see description in [ISBA - National Centre for Meteorological Research](#)), and are  
 232 prescribed as surface mass sources with null salinity, and we use a multiplicative factor of 90%  
 233 based on a comparison with the HYBAM interannual timeseries (HYBAM, 2018). The model  
 234 is forced at its open boundaries by the fifteen major high-frequency tidal constituents (M2, S2,  
 235 N2, K2, 2N2, MU2, NU2, L2, T2, K1, O1, Q1, P1, S1, and M4) and barotropic currents derived  
 236 from FES2014 atlas (Lyard et al., 2021). At the open boundaries, we prescribe MERCATOR-  
 237 GLORYS12 v1 (Lellouche et al., 2018) for temperature, salinity, sea level, current velocity and  
 238 derived baroclinic velocity.

239 The simulation was initialized on the 1st of January 2005, and ran for 10 years until  
 240 2015. In this study, we use model outputs from 2013 to 2015. Indeed, the model has reached  
 241 an equilibrium in terms of seasonal cycle after 2 years ~~(2005-2006)~~ of run. The same model  
 242 configuration without the tides is used to highlight the influence of tides and IT on the  
 243 temperature structure. To assess the realism of the model, we perform validation of various  
 244 state variables used in this study such as the current's circulation, temperature, salinity,  
 245 stratification as well as the barotropic and baroclinic tide properties.

## 246 II.3. Methods

### 247 II.3.1. Barotropic/baroclinic tide separation and tide energy budget

248 We follow Kelly et al. (2010) ~~method~~ to separate barotropic and baroclinic tide  
 249 constituents: pressure, currents and energy flux. No modal separation is done, then tidal  
 250 constituents obtained encompass the energy of all propagation's modes. Note that the  
 251 barotropic/baroclinic tide separation is performed directly by the model for better accuracy,  
 252 ~~however, by this way~~ even though it has the disadvantage of being very costly in terms of computing time.  
 253 We therefore analyze only for one year (2015) the M2 frequency, since M2 is the major tidal  
 254 constituent in this region, representing ~ 70% of the tidal energy (Beardsley et al., 1995;  
 255 Gabioux et al., 2005 and Tchilibou et al., 2022).

256 The barotropic and baroclinic tide energy budget equations are obtained by ignoring as  
 257 ~~the~~ <sup>a</sup> first-order approximation the energy tendency, the nonlinear advection and the forcing  
 258 terms (Wang et al., 2016). Then, the remaining equations are reduced to the balance between  
 259 the divergence of the energy flux, the dissipation and the energy conversion from barotropic to  
 260 baroclinic (Buijsman et al., 2017; Tchilibou et al., 2018, 2020, 2022; Jithin and Francis, 2020  
 261 ; Peng et al., 2021) :

$$262 \quad D_{bt} + \nabla_h \cdot F_{bt} + CVR \approx 0 \quad (W \cdot m^{-2}), \quad (1)$$



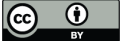

263 
$$D_{bc} + \nabla_h \cdot F_{bc} - CVR \approx 0 \quad (\text{W.m}^{-2}), \quad (2)$$

264 *bt* and *bc* indicate the barotropic and baroclinic terms, *D* is the depth-integrated energy  
 265 dissipation, which can be understood as a proxy of the real dissipation since *D* may encompass  
 266 the energy loss of other tidal harmonics, non-linear terms and/or numerical dissipation (see  
 267 Nugruho et al., 2018),  $\nabla_h \cdot F$  represents the divergence of the depth-integrated energy flux,  
 268 whilst *CVR* is the depth-integrated barotropic-to-baroclinic energy conversion, i.e. the amount  
 269 of incoming barotropic energy which is converted into internal tides energy over the steep  
 270 topography, with :

271 
$$CVR = \langle \nabla H \cdot U_{bt}^* P_{bc}^* \rangle \quad (\text{W.m}^{-2}), \quad (3)$$

272 
$$F_{bt} = \int_H^\eta \langle U_{bt} P_{bt} \rangle dz \quad (\text{W.m}^{-1}), \quad (4)$$

273 
$$F_{bc} = \int_H^\eta \langle U_{bc} P_{bc} \rangle dz \quad (\text{W.m}^{-1}), \quad (5)$$

274 where the angle bracket denotes the average over tidal period,  $\nabla H$  is the slope of the bathymetry,  
 275  $U_{bt}^*$  is the barotropic current and  $P_{bc}^*$  is the baroclinic pressure perturbation both at the bottom,  
 276 *H* is the bottom depth,  $\eta$  the surface elevation,  $U(u, v)$  is the horizontal velocity, *P* is the  
 277 pressure, then *F* is the energy flux and allows the propagation pathways of the given tide to be  
 278 highlighted.

### 279 II.3.2. 3-D heat budget equation for temperature

280 The three-dimensional temperature budget was computed online and further analyzed.  
 281 It is the balance between the total temperature trend and the sum of the temperature advection,  
 282 diffusion and solar radiative and non-solar radiative fluxes (e.g.: Jouanno et al., 2011;  
 283 Hernandez et al., 2017):

284 
$$\partial_t T = \underbrace{-u\partial_x T - v\partial_y T - w\partial_z T}_{ADV} - \underbrace{\partial_z(Kz\partial_z T)}_{ZDF} + LDF_T + FOR_z + Numdiff \quad (^\circ\text{C.s}^{-1}), \quad (6)$$

285  $\underbrace{-u\partial_x T - v\partial_y T - w\partial_z T}_{ADV}$  where *T* is the model potential temperature, [*u, v, w*] are the ~~space dimensional~~  
 286 components, *ADV* is the 3-D temperature advection (left to right: zonal, meridional and vertical  
 287 terms), *ZDF* is the vertical diffusion, *LDF<sub>T</sub>* is the lateral diffusion, *FOR<sub>z</sub>* is the tendency of  
 288 temperature due to penetrative solar radiation and has a vertical decaying structure. At the air-  
 289 sea interface, the temperature flux is equal to the non-solar heat flux (sum of the latent, sensible  
 290 and net infrared fluxes). *FOR<sub>z</sub>* can modify temperature in the thin surface layer but will not be



292 shown in the following. *Numdiff* corresponds to ~~the sum of~~ the numerical diffusion for the  
293 temperature. In this study, we assume that this last term is of second order and is not highlighted  
294 here.

### 295 **II.3.3. The atmosphere–ocean net heat flux**

296 The atmosphere–ocean net heat flux ( $Q_t$ ) reflects the balance of incoming and outgoing  
297 heat fluxes across the atmosphere–ocean interface (e.g.: Moisan and Niiler, 1998; Jayakrishnan  
298 and Babu, 2013), it is defined as follows:

$$299 \quad Q_t = Q_{SW} \pm Q_{LW} \pm Q_{SH} \pm Q_{LH} \quad \cancel{Wm^{-2}}, \quad (7)$$

300 with from left to right: the incident solar radiative flux ( $Q_{SW}$ ), the net infrared radiative flux  
301 ( $Q_{LW}$ ), the incoming/outgoing sensible heat flux ( $Q_{SH}$ ) which depends on the temperature  
302 difference between the atmosphere and the ocean surface, and the incoming/outgoing latent  
303 heat flux ( $Q_{LH}$ ) which depends on the specific humidity difference between the atmosphere and  
304 the ocean surface. All these four components of ~~the~~  $Q_t$  influence the variation of the ocean  
305 surface temperature (SST). The last two components ( $Q_{SH}$  and  $Q_{LH}$ ) have in addition a direct  
306 dependence relationship with the SST. Since IT can change the SST, we are therefore interested  
307 in knowing how it affects the net heat flux at the atmosphere–ocean interface.

## 308 **III. Model validation**

309 In this subsection we present for the M2 harmonic the barotropic and baroclinic tidal  
310 characteristics of the model for the year 2015, and the SST for the whole period from 2013 to  
311 2015, and we verify that they agree with the different observations.

### 312 **III.1. M2 Tides in the model**

313 The barotropic SSH (Fig.2b) of the model is compared with FES2014 (Lyard et al.  
314 2021) (Fig.2a), <sup>and</sup> there is good agreement in terms of both amplitude and phase. Nevertheless,  
315 near the coast, some differences are observed in terms of amplitude. The SSH of the model is  
316 lower ( $\sim +50$  m) north of the mouth of the Amazon. However, inland and on the southern part  
317 of the mouth, the model overestimates the amplitude ( $\sim +20$  m and  $\sim +40$  m respectively). This  
318 is in terms of order of magnitude like the biases in the Ruault et al. (2020) configuration that  
319 they compared to the FES2012 product (Carrère et al., 2012) over the same region. Along the  
320 steep slope of the bathymetry (see Fig.1), a portion of the incident barotropic tidal energy (black  
321 arrows Fig.2c and Fig.2d, for FES2014 and the model, respectively) in the presence of  
322 stratification is converted to baroclinic tidal energy. We compared the depth-integrated

Display figures in order of reference.  
2a, 2b, ...



323 barotropic-to-baroclinic energy conversion rate (CVR) between the model (Fig.2d) and  
324 FES2014 (Fig.2c). The model does reproduce the same conversion patterns of FES2014 but  
325 can underestimate the CVR by about 30%. The bathymetry resolution plays a critical role in  
326 CVR (Niwa and Hibiya, 2011), <sup>meaning that</sup> then the difference in bathymetry resolution between the model  
327 (~ 3 km) and FES2014 (~ 1.5 km) could therefore explain <sup>the</sup> ~~that~~ difference in CVR.

328 <sup>?</sup> The critical slope for the M2 harmonic on the slope is greater than 1.2 (not shown),  
329 consequently, the ~~baroclinic tides~~ (internal tidal waves) thus generated will therefore propagate  
330 in the opposite direction to the barotropic tides, i.e., from the slope to the open ocean. The  
331 baroclinic tidal flux of the model (black arrows in Fig.2e) highlights the existence of six main  
332 sites of IT generation on the continental slope, two of which are more important (A and B), as  
333 shown by Maghalaes et al. (2016), Barbot et al. (2021) and Tchilibou et al. (2022). From these  
334 two main sites, the flow propagates offshore for nearly 1000 km. On its propagation path, the  
335 baroclinic tide ~~signs at the surface in SSH~~. We compared this signature <sup>has a SSH signature?</sup> ~~for the~~ model (Fig.2h)  
336 with an estimate deduced ~~from the altimeter tracks, produced by Zaron et al. (2019) (Fig.2g).~~  
337 The model is in good agreement with the altimetry observations, <sup>this is also a model. ≠ methods produce ≠ estimates</sup> with an overestimation of the  
338 order of ~ +1.5 cm on the SSH maxima. It is important to note that the baroclinic SSH of ~~the~~ <sup>our</sup>  
339 model is an average over the year 2015, whilst ~~the observations~~ are an average over about 20  
340 years. ~~This longer period may smooth the amplitude of the signal obtained from the altimetry~~  
341 ~~observations~~. <sup>Except that Zaron's output is less smooth.</sup> Also, the variability contained in the two averages is not the same, and this may  
342 explain some differences in the positioning and amplitude of the maxima.

343 Figure 2f shows the full depth-integrated internal tidal energy dissipation for the model.  
344 The estimated local dissipation of this energy is defined as follows:

$$345 \quad P = (D_{bc} / CVR) * 100 \quad (8)$$

346 The local dissipation is then integrated at the embankment level in boxes A1, A2 and B  
347 (Fig.2f, see coordinates in Table-2 in Tchilibou et al. 2022) and provides information that a  
348 significant part of the energy is dissipated locally in the different boxes, i.e., about 30% (not  
349 shown). The local dissipation at the generation sites is thus in good agreement with Tchilibou  
350 et al. (2022). The remaining energy is exported offshore and dissipates along the propagation  
351 path. This dissipation is more extensive offshore along path A, ~ 500 km from the slope, with  
352 two patterns spaced approximately 120 km apart corresponding to propagation mode-1, and  
353 less extensive offshore along path B, ~ 100-200 km from the slope (Fig.2f).

Why is dissipation in Fig. 2f positive or negative?

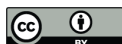

354 We have presented here only the dissipation for the M2 harmonic, but in the rest of the  
355 paper, we will analyze the temperature fields on a seasonal scale and by this fact, the effect of  
356 all the tidal harmonics on the temperature are considered.

### 357 **III.2. SST Validation**

358 Figure 3 shows the mean SST from TMI SST, tidal simulation and non-tidal simulation  
359 over the entire 2013-2015 period. The mean SST of the tidal simulation (Fig.3b) reproduces  
360 well spatially the TMI SST observations (Fig.3a) both for cooling on the shelf around 47.5°W  
361 and to the southeast between 40°W–35°W and 2°S–2°N, which is almost absent for the non-  
362 tidal simulation (Fig.3c). To the northeast, between 50°W–54°W and 3°N–8°N in the Amazon  
363 plume, the SST of the non-tidal simulation is in better agreement with the observations, while  
364 the SST of the tidal simulation is about ~~1~~ °C cooler than TMI SST. Such a difference is very  
365 similar to what is obtained by other models in the same region (Hernandez et al., 2016, 2017;  
366 Gévaudan et al., 2022). The seasonal cycle of the SST of the three products for the three years  
367 2013-2015 (Fig.3d) is obtained by interpolating the SST of both simulations on the TMI SST  
368 grid and averaging in the dashed boxes around the IT generation areas (Fig.3a, b, and c) with  
369 the shelf being masked over the 200 m isobath. The tidal and non-tidal simulations of the model  
370 reproduce well both the seasonal cycle and the standard deviation of the observations, with a  
371 low RMSE of approximately  $10^{-2}$  °C between each simulation and TMI SST (Fig.3d), which  
372 indicates the good quality of our model simulations. Nevertheless, over the seasonal cycle, it  
373 appears that between January-April and July-December, the tidal simulation is closer to the  
374 observations, while the non-tidal simulation seems slightly warmer than the observations; and  
375 in May-June, both simulations are colder than TMI SST (Fig.3d).

## 376 **IV. Results**

377 In this section, we will present the influence of IT on the SST, the associated processes,  
378 and the impact on the net atmosphere-ocean heat flux from the model's tidal and non-tidal  
379 simulations. The analyses were performed on a seasonal scale between April-May-June (AMJ)  
380 and August-September-October (ASO) for the three years 2013-2015.

### 381 **IV.1. Tide-enhanced surface cooling**

382 Beginning in July, a tongue of cold water (< 27 °C) begins to form to the southeast and  
383 enters the central part of the plateau in August and remains there until October. Figure 3e-g  
384 show the SST, averaged over the ASO season. The tidal simulation (Fig.3f) shows that the  
385 upwelling cell, represented by the extension of the 27.2 °C isotherm along the slope to about

Should  
this be  
its own  
figure?



386 49°W–3°N, extends further north than in the non-tidal simulation (Fig.3g, 45°W–0°N) which  
 387 is in better agreement with the TMI SST observations over the same period (Fig.3e).

4a first

388 The general impact of the tide, illustrated by showing the difference in SST between  
 389 the tidal and the non-tidal simulations in both seasons (Fig.4c-d, respectively for AMJ and  
 390 ASO), is a cooling over a large part of the study area with maxima (up to -0.3 °C): in the  
 391 Amazon plume downstream of the river mouth (northeast beyond 3°N), and on the path of  
 392 propagation of IT for both seasons. For ASO, tides induce a warming (> +0.3 °C) on the shelf  
 393 at the mouth of the Amazon River, while for AMJ it is a cooling (-0.3 °C). East of 45°W, the  
 394 tide-induced cooling for each of the two seasons has different spatial structures, but this is  
 395 probably due to different mesoscale variability between the two seasons.

redundant

396 **IV.2. Impact in the Atmosphere–Ocean Net heat flux ( $Q_T$ )**

$Q_T$  or  $Q_t$ ?

397 Associated with the cooling of the SST, the tide induces  $Q_t$  anomalies whose spatial  
 398 structure is very similar to the SST. Indeed, the difference in  $Q_t$  is essentially positive over the  
 399 whole domain during the AMJ season (Fig.4a) with average maximum values around 25 W.m<sup>-2</sup>  
 400 in the plume and the Amazon retroflection to the northeast and along A and B. During the ASO  
 401 season, there is as for the temperature at the mouth of the Amazon an inverse anomaly of ~~1~~-25  
 402 W.m<sup>-2</sup> (Fig.4b). In each season, the spatial structure of the  $Q_t$  difference almost perfectly  
 403 matches that of the SST difference. Knowing that the atmosphere and the underlying ocean are  
 404 in a certain equilibrium, the cooling of the SST by the water masses arriving at the surface will  
 405 disturb this balance. In response, a consequent variation of the net heat flux from the  
 406 atmosphere to the ocean, will try to restore the balance. As shown by the very strong and  
 407 significant negative correlation between the difference in  $Q_t$  and the difference in SST. For the  
 408 AMJ season, we have a negative correlation of -0.97 with a significance of  $R^2 = 0.95$ , and about  
 409 the same as for the ASO season with -0.98 and 0.96 respectively for negative correlation and  
 410 its significance (Fig.9f). You don't have a Fig. 9f.

verb missing

411 The integral over the entire domain of the net heat flux for each season and for each  
 412 simulation (Fig.4e) shows that during the AMJ season, the  $Q_t$  increases from 23.85 TW for the  
 413 non-tidal simulation to 35.7 TW for the tidal simulation, an increase of +33.2 %, two times  
 414 greater than that found (15 %) by Tchilibou et al. (2020) in Solomon Sea. Thus, the tide and IT  
 415 are responsible for a third of the variation in net atmosphere-ocean heat flux during this season.  
 416 While during the second ASO season, there is a smaller increase in  $Q_t$  of +7.4%, i.e., a variation  
 417 from 73.03 TW to 78.83 TW between the non-tidal and tidal simulations.



418 We also note the considerable difference in integrated  $Q_t$  between seasons. We start  
419 from values below 36 TW in the AMJ season to values above 73 TW in the ASO season, i.e.,  
420 a multiplication by a factor of at least order 2. These larger values could probably be related  
421 with the appearance of the upwelling cell described above, knowing that cooler SSTs induce  
422 stronger  $Q_t$ .

#### 423 IV.3. Vertical structure of the Temperature along A

424 To further analyze the temperature changes between both simulations, we made vertical  
425 sections following the path of IT emanating from sites A and B (blue and red line in Figure 2e  
426 respectively). We will show only the results following path A, but the results are similar for  
427 path B.

428 Figure 5 shows vertical sections of temperature for the two seasons following A. For  
429 the AMJ season, over the slope and near the coast, cold water ( $< 27.6^\circ\text{C}$ ) remains below the  
430 surface at  $\sim 20$  m for the tidal simulation (Fig.5a) and deeper at  $\sim 60$  m for the non-tidal  
431 simulation (not shown), it then rises to the surface more than 400 km offshore for both  
432 simulations. Although at the surface the difference in SST between the two simulations (tide -  
433 no-tide) is relatively small ( $\sim -0.3^\circ\text{C}$ , Fig.4c), because the SST is damped by the heat fluxes,  
434 further down the water column, this difference becomes much larger ( $> \pm 1.2^\circ\text{C}$ , Fig.5c).

435 Above the thermocline ( $< 120$  m, cyan and yellow lines in Fig.5c), the simulation with the tides  
436 is colder by  $+1.2^\circ\text{C}$  from the slope where the IT are generated to the open ocean following their  
437 propagation path. Conversely, below the thermocline, the tidal simulation is warmer by  $+1.2$   
438  $^\circ\text{C}$  up to  $\sim 300$  m along the same propagation path. During this AMJ season, the thermocline  
439 ( $\sim 100$  m  $\pm 15$  m, thick dashed black line, Fig.5a) and the mixing layer ( $\sim 40$  m  $\pm 20$  m, thick  
440 dashed white line, Fig.5a) have a very weak slope between the coast and the open ocean.

441 Furthermore, the difference in isodensity depths between the two simulations is small (not  
442 shown), as are the depths of the thermocline ( $\sim 10$  m, Fig.5c) and the mixing layer (not shown),  
443 although these different depths are closer to the surface for the tidal simulation (not shown).

444 Over the whole domain (not shown), the thermocline is deeper by 15 m on average in the non-  
445 tidal simulation, following the propagation paths of the IT energy flow, on the Amazon shelf  
446 and plume. While the mixing layer in the non-tidal simulation is deeper by an average of 13 m  
447 over the shelf, 4 m on average along the IT propagation paths and close to zero in the Amazon  
448 plume.

449 During the ASO season, cold waters ( $< 27.6^\circ\text{C}$ ) previously confined below the surface  
450 during the previous season (AMJ) then rise to the surface. These cold waters extend over the

Your definition of cold water keeps changing between  $27^\circ$  and  $27.6^\circ$

"colder by  $-1.2^\circ$ "  
=  
"warmer by  $+1.2^\circ$ "

Did you ever define what it was?

Is the deepening only along the paths?



451 slope and up to about 150 km offshore in the non-tidal simulation (not shown) and up to 250  
452 km offshore in the tidal simulation (Fig.5b). The isotherm 27.2 °C reaches the surface above  
453 the slope in the tidal simulation but remains below the surface (~ 30 m) in the non-tidal  
454 simulation (not shown). At the surface and in the surface layers, the temperature in the presence  
455 of the tide and IT is therefore cooler. The temperature difference between the two simulations  
456 in the ASO season (Fig.5d) is smaller (< 0.4 °C) in the surface layers (< 40 m) near the coast  
457 compared to the AMJ season (Fig.5c). In contrast, during the ASO season, this cooling reaches  
458 the surface and results in a colder SST (-0.3 °C) (Fig.4d) along A. The strongest cooling (~ -  
459 1.2 °C) is deeper between 60 and 140 m depth. Below the thermocline, warming (+1.2 °C) is  
460 also present, but extends slightly less (~ 650 km) offshore (Fig.5d) compared to the AMJ season  
461 (~ 1000 km, Fig.5c). During this ASO season, the coastward slope of the thermocline and  
462 mixing layer becomes somewhat steeper compared to the other season. In both simulations,  
463 there is a dip of ~ 80 m (~60 m offshore and ~140 m inshore) and ~40 m (~30 m offshore and  
464 ~70 m inshore), respectively for the thermocline (thick dashed black line, Fig.5b) and the  
465 mixing layer (thick dashed white line, Fig.5b). Over the entire domain (not shown) between  
466 the two simulations (tide - no-tide), the tide deepens the thermocline depth by +6 m on the shelf  
467 and +12 m at the plume and along the propagation path of A. As for the mixing layer, which is  
468 deeper in the tidal run by 12 m along the shelf and along the propagation path of A.

469 Between the two seasons, there is also a change in the vertical density gradient between  
470 the coast and the open sea. In the simulation with tide (Fig.5a) and without tide (not shown),  
471 during the AMJ season, a strong vertical density gradient is present near the coast and decreases  
472 towards the open sea. In contrast, during the second ASO season, the vertical density gradient  
473 is weaker inshore than offshore. This clearly highlights a seasonality in the vertical density  
474 gradient profile in agreement with Tchilibou et al. (2022). The transect of the temperature  
475 differences between the two simulations (Fig.5c-d) show that IT (and probably the tide) can  
476 influence the temperature in the ocean from the surface to the bottom, with a greater effect on  
477 the first 300 meters. One question we address in this paper is to better understand what  
478 processes are at work that explain these temperature changes.

#### 479 IV.4. Processes involved modifying the temperature

480 To explain the observed surface and water column temperature changes, we calculated  
481 the trend terms of the temperature evolution equation (see Section II.3.2, Equation 6) for both  
482 seasons (AMJ and ASO) also averaged over the three years from 2013 to 2015.



#### 483 IV.4.1. Vertical diffusion of Temperature

484 Figure 6 shows the vertical temperature diffusion term (ZDF) for both seasons AMJ  
485 (left panel) and ASO (right panel). The ZDF is averaged between 2–20 m, i.e., within the  
486 mixing layer depth range. For the AMJ season, the ZDF of the tidal simulation (Fig.6a) shows  
487 a negative trend (cooling) in the whole domain, which is maximum on the continental slope  
488 where the IT are generated and on their propagation path ( $< -0.4 \text{ }^\circ\text{C}\cdot\text{day}^{-1}$ ), with larger  
489 horizontal extent along A (~700 km from the coasts) compared to B (~300 km from the coasts).  
490 Over the rest of the domain, it remains very low ( $> -0.1 \text{ }^\circ\text{C}\cdot\text{day}^{-1}$ ). For the non-tidal simulation  
491 (Fig.6c), the ZDF is very weak ( $> -0.1 \text{ }^\circ\text{C}\cdot\text{day}^{-1}$ ) over the entire domain, demonstrating that  
492 internal tidal waves would be the main driver of the vertical temperature diffusion in this region  
493 during this season. For the second ASO season, the tidal simulation (Fig.6b) shows a decrease  
494 of the ZDF along the coast and a strengthening offshore following A, but with the same cooling  
495 trend ( $< -0.4 \text{ }^\circ\text{C}\cdot\text{day}^{-1}$ ). While along B, it becomes almost closed to zero, both at the coast and  
496 offshore (Fig.6b). In addition, the mesoscale circulation intensifies during this season.  
497 Therefore, to the northeast, approximately between  $4^\circ\text{N}$ – $8^\circ\text{N}$ , and  $47^\circ\text{W}$ – $53^\circ\text{W}$ , there is a  
498 cooling on the shelf ( $\sim +0.3 \text{ }^\circ\text{C}\cdot\text{day}^{-1}$ ) with NBCR-like patterns, both in the tidal simulation  
499 (Fig.6b) and in the non-tidal simulation (Fig.6d).

500 On the vertical following A, we notice an inter-thermocline vertical profile for the  
501 simulation with tide in the two seasons AMJ and ASO (respectively Fig.6e and 6f), with a  
502 cooling tendency ( $< -0.4 \text{ }^\circ\text{C}\cdot\text{day}^{-1}$ ) above the thermocline and a warming ( $> +0.4 \text{ }^\circ\text{C}\cdot\text{day}^{-1}$ )  
503 below the thermocline, with an average vertical extension of ~ 350 m depth for the maximum  
504 values, but which exceeds 500 m depth for the low values ( $< +0.1 \text{ }^\circ\text{C}\cdot\text{day}^{-1}$ ). Over the slope,  
505 we see, as for the horizontal averages, this weakening of the ZDF between the AMJ (Fig.6e)  
506 and ASO (Fig.6f) seasons and the strengthening offshore. On the other hand, on the vertical,  
507 we observe towards the open sea ( $> 200 \text{ km}$ ) that the ZDF maxima seem to be discontinuous  
508 and spaced of about 120–150 km during the AMJ season (Fig.6e), while we have a more  
509 continuous diffusion for the ASO season (Fig.6f). This is consistent with the ZDF vertical  
510 averages (Fig.6a-b). For the non-tidal simulation, the vertical temperature diffusion tends  
511 towards  $0 \text{ }^\circ\text{C}\cdot\text{day}^{-1}$  within the water column but remains quite large ( $> -0.2 \text{ }^\circ\text{C}\cdot\text{day}^{-1}$ ) in the  
512 thin surface layer (Fig.6g-h).

513 During the AMJ season, the ITCZ is close to the equator and thus the trade Winds have  
514 their maximum intensity in the heart of the domain, while they migrate northward for the ASO  
515 season. As a result, more wind-generated diapycnal mixing is expected in the domain during

going in which direction?

Not how you use "while"

Doesn't quite work in the sentence





516 the AMJ season compared to the ASO season. But the average value of the ZDF ( $\sim -0.2$   
517  $^{\circ}\text{C}\cdot\text{day}^{-1}$ ) is the same between the two seasons and for both simulations (not shown) over most  
518 of the domain (except for the areas of the NBC backscatter for both simulations, on IT's  
519 generation sites and on their propagation path for the tidal simulation). This implies that the  
520 ability of the wind to generate diapycnal mixing in the underlying ocean surface layer could be  
521 limited by various oceanic processes in this region or is not well considered in the model.

522 Furthermore, it is important to note that along the IT propagation's pathway, the  
523 maximum of the ZDF follows the maxima of the baroclinic tidal energy dissipation (Fig.2f).  
524 Thus, the dissipation of IT generated on the continental slope generates vertical mixing that  
525 enhances the cooling observed at the surface along the coast. In addition, this temperature  
526 diffusion contributes to greater subsurface cooling, and warming in the deeper layers beneath  
527 the thermocline.

528 In section IV.3 the seasonality of the vertical gradient of stratification was highlighted,  
529 which is stronger at the coast relative to the open ocean during the AMJ season, and reverses  
530 during the ASO season to become stronger offshore relative to the coast. This could explain  
531 why the ZDF is stronger along the slope and along the near-coastal pathway B during the AMJ  
532 season (Fig.6a), while it is weaker along the slope and closed to zero following B during the  
533 ASO season (Fig.6b). The vertical gradient of density (and thus stratification) over the slope  
534 influences the generation of IT, by controlling the propagation mode of the IT that are generated  
535 (e.g.: Tchilibou et al., 2020 and Barbot et al., 2021). We show here that this vertical gradient  
536 also plays on the fate of these IT, in this case on their dissipation. The vertical gradient of the  
537 stratification thus determines where the internal tidal waves dissipate their energy in the water  
538 column.

#### 539 **IV.4.2. Vertical advection of Temperature**

540 The vertical temperature advection ( $z$ -ADV) averaged between 2–20 m is almost zero  
541 in these surface layers throughout the region (Fig.7a, b, c, and d). For both seasons, some weak  
542 extreme values are in the northwest on the plateau between  $54^{\circ}\text{W}$ – $50^{\circ}\text{W}$  and  $3^{\circ}\text{N}$ – $3^{\circ}\text{N}$ ) and  
543 are of the same intensity between the two simulations. With a slight intensification when  
544 moving to the ASO season ( $\sim -0.3$   $^{\circ}\text{C}\cdot\text{day}^{-1}$ ). The  $z$ -ADV is zero at the IT generation sites and  
545 along their propagation pathways, so the almost zero difference between the two simulations  
546 for each season shows that the IT and barotropic tide do not generate vertical temperature  
547 advection within these ocean surface layers. The  $z$ -ADV does not contribute to the temperature  
548 change in the surface layers of the ocean, and therefore does not influence the cooling observed



549 from the surface on the SST. On the other hand, deeper, under the mixed layer and close to the  
550 thermocline, the  $z$ -ADV structure is more marked.

551 Vertical sections following A (Fig.7e, f, g and h) show an intensification of  $z$ -ADV  
552 below the mixing layer and near the thermocline between 80 and 200 m ( $\sim \pm 0.8$  °C.day<sup>-1</sup>).  
553 During the AMJ season, over the vertical, the  $z$ -ADV appears to be rather dominated by a  
554 cooling trend. The tidal simulation (Fig.7e) shows a cooling trend ( $\sim -0.8$  °C.day<sup>-1</sup>), on the  
555 slope where the IT are generated, with an average vertical extension from  $\sim 20$  to 200 m depth.  
556 Then offshore, two cooling hotspots ( $\sim -0.8$  °C.day<sup>-1</sup>) followed by a weaker one ( $\sim -0.3$   
557 °C.day<sup>-1</sup>) spaced about 120–150 km apart, <sup>separated</sup> interspersed by two warming zones, respectively  $\sim$   
558  $+0.6$  °C.day<sup>-1</sup> and  $\sim +0.3$  °C.day<sup>-1</sup> from the coast. For the non-tidal simulation (Fig.7g), the  $z$ -  
559 ADV is much less intense with lower values ( $< \pm 0.3$  °C.day<sup>-1</sup>) near the coast until  $\sim 300$  km  
560 offshore, followed by a cooling hotspot ( $\sim -0.8$  °C.day<sup>-1</sup>) between 300 km and 500 km. For  
561 both simulations, the extreme values appear to be centered around the mean depth of the  
562 thermocline (thick black outline) and do not cross the mixing layer depth (thick magenta  
563 outline). They are on average located between 40 m and 200 m depth and follow the position  
564 of the maximum vertical density gradient between isodensity anomalies 23.8–26.3 kg.m<sup>-3</sup>.

565 For the ASO season, the simulation with tide (Fig.7f) still shows the same cooling  
566 intensity on the slope, although deeper ( $\sim 60$  m and 250 m), as well as offshore with this time  
567 the third cooling hotspot more intense ( $\sim -0.8$  °C.day<sup>-1</sup>) than during the AMJ season (Fig.7e).  
568 The non-tidal simulation (Fig.7h) shows a less intense  $z$ -ADV ( $< \pm 0.1$  °C.day<sup>-1</sup>) near the slope,  
569 and a little stronger offshore ( $\sim \pm 0.3$  °C.day<sup>-1</sup>) between 300 and 600 km from the slope,  
570 although less intense than the previous season.

571 As in the AMJ season, the extreme values of  $z$ -ADV follow the vertical density gradient  
572 in both simulations. During the ASO season, the maximum of the vertical density gradient is  
573 between 23.8 and 26.2 kg.m<sup>-3</sup> and is deeper at the coast and is closer to the surface offshore.  
574 Thus, the extreme values of  $z$ -ADV are located a little deeper, between 80 and 300 m.  
575 Furthermore, for the non-tidal simulation and during both seasons, the position relative to the  
576 coast of the extreme values are shifted regarding those ones of the same polarity in the  
577 corresponding tidal simulation, which means that the presence of the IT and the tides could  
578 modify the intensity and patterns of the  $z$ -ADV produced by the other oceanic processes.

579 In addition, we averaged the  $z$ -ADV between deeper depths above the thermocline  
580 depth (20–70 m) and below the thermocline (148–250 m) depth for all simulations and both  
581 seasons (not shown). This allows to highlight the NBC's pathway through the extreme values



582 of the  $z$ -ADV close to the coast and its retroreflection offshore to the northeast for both  
583 simulations, but also the propagation of the IT from the coast to the open sea from the two main  
584 sites A and B for the simulation with tide. Thus, we see that the IT and the general circulation  
585 are the main drivers of the vertical temperature advection in the subsurface and deeper layers  
586 in this region.

#### 587 **IV.4.3. Horizontal advection of temperature**

588 Horizontal advection of temperature ( $h$ -ADV) is defined as the sum of the zonal ( $x$ -  
589 ADV) and meridional ( $y$ -ADV) terms of temperature advection. The  $h$ -ADV is also averaged  
590 between 2–70 m for each simulation during both seasons (Fig.8a, b, c and d). As obtained with  
591  $z$ -ADV, horizontal advection of temperature tends to zero over the entire domain in the surface  
592 layers for both seasons in both simulations, with some weak extreme values located in the  
593 northwest on the plateau between  $54^{\circ}\text{W}$ – $50^{\circ}\text{W}$  and  $3^{\circ}\text{N}$ – $3^{\circ}\text{N}$  that intensify during the ASO  
594 season ( $\sim \pm 0.2^{\circ}\text{C}\cdot\text{day}^{-1}$ ) (Fig.8b and d). Along the slope between sites A and B during the AMJ  
595 season, the  $h$ -ADV generates a small warming ( $\sim +1^{\circ}\text{C}\cdot\text{day}^{-1}$ ) that is more pronounced in the  
596 tidal simulation (Fig.8a) than in the non-tidal simulation (Fig.8c), and thus appears to be related  
597 to the IT generated along the slope. On the other hand, the small difference between the two  
598 simulations in the surface layers shows that the tidal processes (IT and barotropic tide) hardly  
599 generate horizontal temperature advection. The low values observed here clearly show that the  
600  $h$ -ADV could not influence the cold-water tongue observed over the surface SST (Fig.3e-g)  
601 during the ASO season.

602 Along the vertical following A, the  $h$ -ADV maxima remain essentially confined below  
603 the mixing layer, with much more intense values in the tidal simulation compared to the non-  
604 tidal simulation. The  $h$ -ADV contributes to both warming and cooling of the temperature ( $\sim$   
605  $\pm 0.4^{\circ}\text{C}\cdot\text{day}^{-1}$ ) from the slope to more than 500 km offshore, with an average vertical extension  
606 between the surface and 400 m depth for the tidal simulation (Fig.8e and f) and a little less  
607 extended between 20–300 m depth for the non-tidal simulation (Fig.8g and h) during both  
608 seasons. The  $h$ -ADV ~~which~~ is low in the surface layers (2–20 m) but maximum in the  
609 subsurface where the stratification is stronger. We also see for the tidal simulation in both  
610 seasons a warming above the slope that reaches the surface with an intensity of about  $+0.4$   
611  $^{\circ}\text{C}\cdot\text{day}^{-1}$  (Fig.8e and f) but remains below the surface ( $\sim 20$  m) in the non-tidal simulation  
612 (Fig.8g and h). This vertical excursion that is observed elsewhere for ZDF and  $z$ -ADV is a  
613 marker of local dissipation of IT at their generation site on the slope, which clearly affects both  
614 vertical diffusion and advection of the temperature. But we have almost null values along the

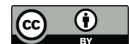

615 slope when averaging  $h$ -ADV or  $z$ -ADV between 2-20 m and much more strong values for  
616 the ZDF (Fig.6a, b, c and d). This means that the IT's energy loss is mostly transferred to the  
617 turbulent scale (mixing). Furthermore, unlike the ZDF (Fig.6e) and  $z$ -ADV (Fig.7e and f), on  
618 the vertical it is difficult to identify a wave structure characteristic of IT propagation in the  $h$ -  
619 ADV.

## 620 **V. Summary and Discussions**

621 In this paper, the impact of internal tidal waves (IT) on temperature, off the Amazon,  
622 especially on the surface and on net heat fluxes is explored through outputs of two twin oceanic  
623 simulations (with and without tides) from a realistic model. The AMAZON36 configuration,  
624 based on the  $1/36^\circ$  resolution NEMO model, can reproduce the generation of internal tides (IT),  
625 i.e., the conversion of energy from barotropic to baroclinic tides, from two most energetic sites  
626 A and B, in good agreement previous studies (Magalhaes et al., 2016 and Tchilibou et al.,  
627 2022). As for dissipation, the model reproduces 30% local dissipation, the rest propagating  
628 offshore from the different generation sites, the two main ones being A and B (Fig.2e). During  
629 their propagation, the IT dissipate most of their energy after two beams of mode-1 reflection  
630 (120–150 km), that is less than 300 km from the slope.

631 The analyses are based on data from three years (2013 to 2015), averaged over two  
632 seasons, AMJ (April-May-June) and ASO (August-September-October) which are highly  
633 contrasted in terms of stratification, circulation and EKE. During ASO, the cold waters ( $< 27.5$   
634  $^\circ\text{C}$ ) of the Atlantic Cold Tongue (ACT) enter our domain along the coast, and are affected by  
635 IT and tides, which leads to a cooler seasonal upwelling.

636 The impact of the tides on temperature was assessed by comparing our twin simulations  
637 with and without tides for each season. For ASO and AMJ, the tides create a cooling of SST of  
638 the order of  $\sim -0.3$   $^\circ\text{C}$  in the plume of the Amazon offshore and along the paths of propagation  
639 A and B of the internal tide. Concerning the Amazon shelf, the tides induce a warming ( $\sim +0.3$   
640  $^\circ\text{C}$ ) in ASO and a cooling (of  $\sim -0.3$   $^\circ\text{C}$ ) in AMJ. These cooler/warmer waters are responsible  
641 in the same location for an increase/decrease in the net heat flux from the atmosphere to the  
642 ocean, leading to an increase ( $Q_t$ ) of +33.2% in AMJ and of +7.4% in ASO between runs with  
643 and without tides. In the subsurface, above the thermocline ( $< 120$  m), the IT and tides induce  
644 a stronger cooling than on the surface of about  $\sim -1.2$   $^\circ\text{C}$  and an associated warming of about  
645  $\sim +1.2$   $^\circ\text{C}$  under the thermocline ( $> 120$  m to 300 m).

646 By increasing the atmosphere to ocean net heat flux ( $Q_t$ ), the IT and tides might reduce  
647 the cloud convection in the atmosphere, as we are in an intertropical convergence zone (ITCZ).

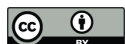

648 Impact on overall atmospheric circulation and precipitation is expected to be significant, as  
649 previously shown in other regions such as Indonesia (Tidal induced cooling of  $-0.3\text{ }^{\circ}\text{C}$  can  
650 reduce precipitation by  $-20\%$ , see Koch-Larrouy et al., 2010).

651 Therefore, it becomes important to note that the interannual or even climatic scale  
652 evolution of internal tidal waves activity must be considered to better understand the future  
653 evolution of the global climate. Especially since thanks to the CanESM5 global climate model,  
654 Yadidya and Rao (2022) have just shown that in the Andaman Sea and Bay of Bengal, towards  
655 the end of this century, for both optimistic and pessimistic SSP scenarios, the increase in depth-  
656 averaged stratification will result in an increase in IT activity in these two regions. Knowing  
657 that the continental slope of northern Brazil is a place of high generation of IT, which therefore  
658 depends on stratification, it is hereby critical to understand how IT activity will evolve in the  
659 coming decades in order to better anticipate the climate, and thus better adapt public policies  
660 at national and international levels to the global context of climate change.

661 Another objective of our study was to understand the processes responsible for these  
662 temperature changes. For this, we analyzed the trend terms of the temperature evolution  
663 equation. Where IT dissipate their energy, there is an intense vertical mixing that generates  
664 vertical diffusion of temperature (ZDF) ( $-0.4\text{ }^{\circ}\text{C}\cdot\text{day}^{-1}$ ) according to pathway A and to a lesser  
665 extent according to pathway B, stronger at shore than offshore during AMJ and inverse during  
666 ASO. The ZDF is the only process that reaches the surface layer, and then appears in first  
667 approximation to be the main process contributing to the surface cooling observed on SST. The  
668 atmospheric heat flux terms ( $FOR_z$ ) could also modify this SST but was not highlighted in this  
669 study. The mixing takes place up to about 800 km off the slope following A, and 300 km  
670 following B. It is also responsible on a seasonal scale, but also daily for a negative average  
671 variation (cooling) of temperature of about  $-0.4\text{ }^{\circ}\text{C}\cdot\text{day}^{-1}$  above the thermocline, and a warming  
672 of  $+0.4\text{ }^{\circ}\text{C}\cdot\text{day}^{-1}$  below 350 m and decreasing to  $+0.1\text{ }^{\circ}\text{C}\cdot\text{day}^{-1}$  around 500 m depth.

673 IT propagation induce vertical advection of water masses around the thermocline level,  
674 which has the effect of producing a subsurface mean temperature cooling ( $\sim -0.8\text{ }^{\circ}\text{C}\cdot\text{day}^{-1}$ ) at  
675 a depth varying between 20–200 m AMJ and 60–250 m in ASO, with three extreme values off  
676 the coast spaced approximately 120–150 km along of the pathway A, which seem to follow the  
677 dissipation patterns, and thus correspond to the horizontal scale of the mode-1 propagation of  
678 IT. Other processes such as zonal and meridional advection of temperature also induce  
679 temperature change in subsurface and deeper layers. Finally, the horizontal (zonal and



680 meridional) advection of temperature in this region is more related to the general circulation  
681 (NBC, mesoscale) but is increased by tides and IT.

682 Thus, it is the combination of these different processes that explains the temperature  
683 change in the water column in this region. Furthermore, in order to explain the cooling of the  
684 SST at the surface, Neto et al. (2014) indicated that the northward transport of water masses by  
685 the constant circulation of the NBC was compensated by a vertical advection of colder water  
686 masses towards the surface. We now know that this vertical advection process fails to modify

and ?

687 the SST but is rather limited below the mixing layer. The same is true for zonal and meridional  
688 advection of temperature (which form horizontal advection). It should be remembered that  
689 vertical diffusion extends from the surface, through the mixing layer, into the deep layers. It is  
690 therefore possible that water masses cooled by both vertical and horizontal advection below  
691 the mixing layer can be recovered and transported vertically to the surface by the effect of  
692 vertical mixing. The change in SST and temperature above the mixing layer then comes from  
693 (i) vertical diffusion of temperature and (ii) a combination of this vertical diffusion and the  
694 advection (vertical and horizontal) of temperature that takes place below the mixing layer.

695 This study focuses on temperature, but other analyses we have done on salinity show  
696 that IT also affects the haline structure of the ocean in this region. A future work would be to  
697 look at the impact on salinity, which is also a key parameter in the functioning of the ocean as  
698 in exchanges with the atmosphere, and thus can play a role on the climate. In addition, internal  
699 waves can also influence the biogeochemical cycles of elements and the entire marine  
700 ecosystem, since they can induce nutrient uptake and thus participate in structuring the spatial  
701 distribution of phytoplankton and zooplankton, and in consequence of the rest of the food chain  
702 that depends on them.

703 It would also be important to compare the results of our model with fields observations.  
704 Two high frequency PIRATA anchorages have been installed offshore at the extremity of our  
705 region between 35°W–38°W and 0°N–5°N (see Bourlès et al. 2019) and could be used for this  
706 purpose. In addition, recently, the “AMAZOMIX” campaign entirely dedicated to IT (27 August  
707 and 8 October 2021) will provide a better understanding of the impact of IT on the marine  
708 environment in this region. In the meantime, a coupled physical/biogeochemistry simulation  
709 (NEMO/PISCES), currently under analysis, will begin to answer these crucial questions of the  
710 impact of internal waves on biogeochemistry.



711 Finally, in this first part, we have focused on describing the effects of internal tidal  
712 waves on temperature variation on a seasonal scale, while the remainder of this work will  
713 address temperature changes on finer time scales, notably on the tidal scale.

714

715

#### 716 **Data availability**

717 The TMI SST v7.1 data are publicly available online from the REMSS platform:  
718 <https://www.remss.com/missions/tmi/>, was accessed on 27 June 2022. The model simulations  
719 are available upon request by contacting corresponding authors.

#### 720 **Authors contributions**

721 Funding acquisition, AKL; Conceptualization and methodology, FA, AKL and ID.  
722 Numerical simulations, GM and FA. Formal analysis, FA; FA prepared the paper with  
723 contribution from all co-authors.

#### 724 **Competing interests**

725 The authors declare that they have no conflict of interest.

726

#### 727 **Acknowledgments**

728 This work is part of the Fernand Assene PhD thesis, cofounded by Institut de Recherche  
729 pour le Développement (IRD) and Mercator Ocean International (MOI). The numerical  
730 simulation was founded by CNRS/CNES/IRD via the projects A0080111357 and  
731 A0130111357 and were performed tank to the IDRIS platform calculator (Jean-Zay).

#### 732 **Abbreviations**

733 The following abbreviations are used in this manuscript:

734 AMASSEDS: A Multi-disciplinary Amazon Shelf SEDiment Study

735 AMAZOMIX: AMAZOn MIXing

736 FES2012 | FES2014: Finite Element Solution 2012 | Finite Element Solution 2014

737 NEMO/PISCES: Nucleus for European MOdeling / Pelagic Interactions Scheme for Carbon  
738 and Ecosystem Studies

739 PIRATA: PredIction and Research moored Array in the Tropical Atlantic

740 REVIZEE : Recursos Vivos da Zona Econômica Exclusiva

741



742 **References**

- 743 Aguedjou, H.M.A., Chaigneau, A., Dadou, I., Morel, Y., Pegliasco, C., Da-Allada, C.Y.,  
744 Baloïtcha, E., 2021. What Can We Learn From Observed Temperature and Salinity  
745 Isopycnal Anomalies at Eddy Generation Sites? Application in the Tropical Atlantic  
746 Ocean. *Journal of Geophysical Research: Oceans* 126, e2021JC017630.  
747 <https://doi.org/10.1029/2021JC017630>
- 748 Aguedjou, H.M.A., Dadou, I., Chaigneau, A., Morel, Y., Alory, G., 2019. Eddies in the  
749 Tropical Atlantic Ocean and Their Seasonal Variability. *Geophysical Research*  
750 *Letters* 46, 12156–12164. <https://doi.org/10.1029/2019GL083925>
- 751 Araujo, M., Dimoune, D.M., Noriega, C., Hounsou-Gbo, G.A., Veleda, D., Araujo, J.,  
752 Bruto, L., Feitosa, F., Flores-Montes, M., Lefèvre, N., Melo, P., Otsuka, A.,  
753 Travassos, R.K., Schwaborn, R., Neumann-Leitão, S., 2021. Camadas Finas III -  
754 BR cruise: S-ADCP data. <https://doi.org/10.17882/80828>
- 755 Araujo, M., Noriega, C., Hounsou-gbo, G.A., Veleda, D., Araujo, J., Bruto, L., Feitosa, F.,  
756 Flores-Montes, M., Lefèvre, N., Melo, P., Otsuka, A., Travassos, K., Schwaborn,  
757 R., Neumann-Leitão, S., 2017. A Synoptic Assessment of the Amazon River-Ocean  
758 Continuum during Boreal Autumn: From Physics to Plankton Communities and  
759 Carbon Flux. *Frontiers in Microbiology* 8.
- 760 Araujo, J.; Mezilet, Y.; Marin, F.; Jouanno, J.; Araujo, M. On the variability of the  
761 upwelling cell off the Amazon River mouth (01072-00001). In: VII Congresso  
762 Brasileiro de Oceanografia - CBO2016, 2016, Salvador, BA. Livro de Resumos -  
763 CBO2016. Salvador, BA: AOCEANO, 2016. v. 1.
- 764 Arbic, B., Richman, J., Shriver, J., Timko, P., Metzger, E., Wallcraft, A., 2012. Global  
765 Modeling of Internal Tides Within an Eddy Ocean General Circulation Model.  
766 *Oceanography* 25, 20–29. <https://doi.org/10.5670/oceanog.2012.38>
- 767 Archer, D., Martin, P., Buffett, B., Brovkin, V., Rahmstorf, S., Ganopolski, A., 2004. The  
768 importance of ocean temperature to global biogeochemistry. *Earth and Planetary*  
769 *Science Letters* 222, 333–348. <https://doi.org/10.1016/j.epsl.2004.03.011>
- 770 Barbot, S., Lagarde, M., Lyard, F., Marsaleix, P., Lherminier, P., Jeandel, C., 2022.  
771 Internal Tides Responsible for Lithogenic Inputs Along the Iberian Continental Slope.  
772 *Journal of Geophysical Research: Oceans* 127, e2022JC018816.  
773 <https://doi.org/10.1029/2022JC018816>



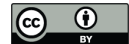

- 774 Barbot, S., Lyard, F., Tchilibou, M., Carrere, L., 2021. Background stratification impacts  
775 on internal tide generation and abyssal propagation in the western equatorial Atlantic  
776 and the Bay of Biscay. *Ocean Science* 17, 1563–1583. [https://doi.org/10.5194/os-17-](https://doi.org/10.5194/os-17-1563-2021)  
777 [1563-2021](https://doi.org/10.5194/os-17-1563-2021)
- 778 Barton, E.D., Inall, M.E., Sherwin, T.J., Torres, R., 2001. Vertical structure, turbulent  
779 mixing and fluxes during Lagrangian observations of an upwelling filament system  
780 off Northwest Iberia. *Progress in Oceanography, Lagrangian studies of the Iberian*  
781 *upwelling system* 51, 249–267. [https://doi.org/10.1016/S0079-6611\(01\)00069-6](https://doi.org/10.1016/S0079-6611(01)00069-6)
- 782 Beardsley, R.C., Candela, J., Limeburner, R., Geyer, W.R., Lentz, S.J., Castro, B.M.,  
783 Cacchione, D., Carneiro, N., 1995. The M2 tide on the Amazon Shelf. *Journal of*  
784 *Geophysical Research: Oceans* 100, 2283–2319. <https://doi.org/10.1029/94JC01688>
- 785 Bordoais, L., Auclair, F., Paci, A., Dossmann, Y., Gerkema, T., Nguyen, C., 2016. Tidal  
786 energy redistribution among vertical modes in a fluid with a mid-depth pycnocline.  
787 *Physics of Fluids* 28, 101701. <https://doi.org/10.1063/1.4964759>
- 788 Bourles, B., Molinari, R.L., Johns, E., Wilson, W.D., Leaman, K.D., 1999. Upper layer  
789 currents in the western tropical North Atlantic (1989–1991). *Journal of Geophysical*  
790 *Research: Oceans* 104, 1361–1375. <https://doi.org/10.1029/1998JC900025>
- 791 Buijsman, M.C., Ansong, J.K., Arbic, B.K., Richman, J.G., Shriver, J.F., Timko, P.G.,  
792 Wallcraft, A.J., Whalen, C.B., Zhao, Z., 2016. Impact of Parameterized Internal Wave  
793 Drag on the Semidiurnal Energy Balance in a Global Ocean Circulation Model.  
794 *Journal of Physical Oceanography* 46, 1399–1419. [https://doi.org/10.1175/JPO-D-](https://doi.org/10.1175/JPO-D-15-0074.1)  
795 [15-0074.1](https://doi.org/10.1175/JPO-D-15-0074.1)
- 796 Buijsman, M.C., Arbic, B.K., Richman, J.G., Shriver, J.F., Wallcraft, A.J., Zamudio, L.,  
797 2017. Semidiurnal internal tide incoherence in the equatorial Pacific. *Journal of*  
798 *Geophysical Research: Oceans* 122, 5286–5305.  
799 <https://doi.org/10.1002/2016JC012590>
- 800 Carrere, L., Lyard, F., Cancet, M., Guillot, A., & Roblou, L. (2012). FES 2012: A new  
801 global tidal model taking advantage of nearly 20 years of altimetry, in *20 Years of*  
802 *Progress in Radar Altimetry*.
- 803 Clayson, C.A., Bogdanoff, A.S., 2013. The Effect of Diurnal Sea Surface Temperature  
804 Warming on Climatological Air–Sea Fluxes. *American Meteorological Society*.
- 805 Collins, M., An, S.-I., Cai, W., Ganachaud, A., Guilyardi, E., Jin, F.-F., Jochum, M.,  
806 Lengaigne, M., Power, S., Timmermann, A., Vecchi, G., Wittenberg, A., 2010. The



- 807 impact of global warming on the tropical Pacific Ocean and El Niño. *Nature Geosci*  
808 3, 391–397. <https://doi.org/10.1038/ngeo868>
- 809 da Silva, J.C.B., New, A.L., Srokosz, M.A., Smyth, T.J., 2002. On the observability of  
810 internal tidal waves in remotely-sensed ocean colour data. *Geophysical Research*  
811 *Letters* 29, 10-1-10–4. <https://doi.org/10.1029/2001GL013888>
- 812 de Macedo, C.R., Koch-Larrouy, A., da Silva, J.C.B., Magalhães, J.M., Lentini, C.A.D.,  
813 Tran, T.K., Rosa, M.C.B., Vantrepotte, V., 2023. Spatial and temporal variability of  
814 mode-1 and mode-2 internal solitary waves from MODIS/TERRA sunglint off the  
815 Amazon shelf. *EGUsphere* 1–27. <https://doi.org/10.5194/egusphere-2022-1482>
- 816 Demaster, D.J., Pope, R.H., 1996. Nutrient dynamics in Amazon shelf waters: results from  
817 AMASSEDS. *Continental Shelf Research* 16, 263–289. [https://doi.org/10.1016/0278-4343\(95\)00008-O](https://doi.org/10.1016/0278-4343(95)00008-O)
- 818
- 819 Denman, K.L., Gargett, A.E., 1983. Time and space scales of vertical mixing and  
820 advection of phytoplankton in the upper ocean. *Limnology and Oceanography* 28,  
821 801–815. <https://doi.org/10.4319/lo.1983.28.5.0801>
- 822 Didden, N., Schott, F., 1993. Eddies in the North Brazil Current retroflexion region  
823 observed by Geosat altimetry. *Journal of Geophysical Research: Oceans* 98, 20121–  
824 20131. <https://doi.org/10.1029/93JC01184>
- 825 Dimoune, D. M., Birol, F., Hernandez, F., Léger, F., Araujo, M., 2022. Revisiting the  
826 tropical Atlantic western boundary circulation from a 25-year time series of satellite  
827 altimetry data. *EGUsphere*, 1-42.
- 828 Egbert, G.D., Ray, R.D., 2000. Significant dissipation of tidal energy in the deep ocean  
829 inferred from satellite altimeter data. *Nature* 405, 775–778.  
830 <https://doi.org/10.1038/35015531>
- 831 Gabioux, M., Vinzon, S.B., Paiva, A.M., 2005. Tidal propagation over fluid mud layers  
832 on the Amazon shelf. *Continental Shelf Research* 25, 113–125.  
833 <https://doi.org/10.1016/j.csr.2004.09.001>
- 834 Garzoli, S.L., Ffield, A., Johns, W.E., Yao, Q., 2004. North Brazil Current retroflexion  
835 and transports. *Journal of Geophysical Research: Oceans* 109.  
836 <https://doi.org/10.1029/2003JC001775>
- 837 Garzoli, S.L., Ffield, A., Yao, Q., 2003. North Brazil Current rings and the variability in  
838 the latitude of retroflexion, in: Goni, G.J., Malanotte-Rizzoli, P. (Eds.), Elsevier

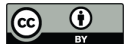

- 839 Oceanography Series, Interhemispheric Water Exchange in the Atlantic Ocean.  
840 Elsevier, pp. 357–373. [https://doi.org/10.1016/S0422-9894\(03\)80154-X](https://doi.org/10.1016/S0422-9894(03)80154-X)
- 841 Gévaudan, M., Durand, F., Jouanno, J., 2022. Influence of the Amazon-Orinoco Discharge  
842 Interannual Variability on the Western Tropical Atlantic Salinity and Temperature.  
843 Journal of Geophysical Research: Oceans 127, e2022JC018495.  
844 <https://doi.org/10.1029/2022JC018495>
- 845 Geyer et al., 1996. Physical oceanography of the Amazon shelf. Continental Shelf  
846 Research 16, 575–616. [https://doi.org/10.1016/0278-4343\(95\)00051-8](https://doi.org/10.1016/0278-4343(95)00051-8)
- 847 González-Haro, C., Ponte, A., Autret, E., 2019. Quantifying Tidal Fluctuations in Remote  
848 Sensing Infrared SST Observations. Remote Sensing 11, 2313.  
849 <https://doi.org/10.3390/rs11192313>
- 850 Heathershaw, A.D., New, A.L., Edwards, P.D., 1987. Internal tides and sediment transport  
851 at the shelf break in the Celtic Sea. Continental Shelf Research 7, 485–517.  
852 [https://doi.org/10.1016/0278-4343\(87\)90092-6](https://doi.org/10.1016/0278-4343(87)90092-6)
- 853 Hernandez, O., Jouanno, J., Durand, F., 2016. Do the Amazon and Orinoco freshwater  
854 plumes really matter for hurricane-induced ocean surface cooling? Journal of  
855 Geophysical Research: Oceans 121, 2119–2141.  
856 <https://doi.org/10.1002/2015JC011021>
- 857 Hernandez, O., Jouanno, J., Echevin, V., Aumont, O., 2017. Modification of sea surface  
858 temperature by chlorophyll concentration in the Atlantic upwelling systems. Journal  
859 of Geophysical Research: Oceans 122, 5367–5389.  
860 <https://doi.org/10.1002/2016JC012330>
- 861 Hersbach, H., Bell, B., Berrisford, P., Hirahara, S., Horányi, A., Muñoz-Sabater, J.,  
862 Nicolas, J., Peubey, C., Radu, R., Schepers, D., Simmons, A., Soci, C., Abdalla, S.,  
863 Abellan, X., Balsamo, G., Bechtold, P., Biavati, G., Bidlot, J., Bonavita, M., De  
864 Chiara, G., Dahlgren, P., Dee, D., Diamantakis, M., Dragani, R., Flemming, J.,  
865 Forbes, R., Fuentes, M., Geer, A., Haimberger, L., Healy, S., Hogan, R.J., Hólm, E.,  
866 Janisková, M., Keeley, S., Laloyaux, P., Lopez, P., Lupu, C., Radnoti, G., de Rosnay,  
867 P., Rozum, I., Vamborg, F., Villaume, S., Thépaut, J.-N., 2020. The ERA5 global  
868 reanalysis. Quarterly Journal of the Royal Meteorological Society 146, 1999–2049.  
869 <https://doi.org/10.1002/qj.3803>



- 870 HYBAM (2018) Contrôles géodynamique, hydrologique et biogéochimique de  
871 l'érosion/altération et des transferts de matière dans les bassins de l'Amazone, de  
872 l'Orénoque et du Congo. <http://www.ore-hybam.org>. Accessed 10 December 2021
- 873 Jackson, C., 2007. Internal wave detection using the Moderate Resolution Imaging  
874 Spectroradiometer (MODIS). *Journal of Geophysical Research: Oceans* 112.  
875 <https://doi.org/10.1029/2007JC004220>
- 876 Jayakrishnan, P.R., Babu, C.A., 2013. Study of the Oceanic Heat Budget Components over  
877 the Arabian Sea during the Formation and Evolution of Super Cyclone, Gonu 2013.  
878 <https://doi.org/10.4236/acs.2013.33030>
- 879 Jithin, A.K., Francis, P.A., 2020. Role of internal tide mixing in keeping the deep  
880 Andaman Sea warmer than the Bay of Bengal. *Sci Rep* 10, 11982.  
881 <https://doi.org/10.1038/s41598-020-68708-6>
- 882 Johns, W.E., Lee, T.N., Beardsley, R.C., Candela, J., Limeburner, R., Castro, B., 1998.  
883 Annual Cycle and Variability of the North Brazil Current. *Journal of Physical*  
884 *Oceanography* 28, 103–128. [https://doi.org/10.1175/1520-0485\(1998\)028<0103:ACAVOT>2.0.CO;2](https://doi.org/10.1175/1520-0485(1998)028<0103:ACAVOT>2.0.CO;2)
- 886 Johns, W.E., Lee, T.N., Schott, F.A., Zantopp, R.J., Evans, R.H., 1990. The North Brazil  
887 Current retroflection: Seasonal structure and eddy variability. *Journal of Geophysical*  
888 *Research: Oceans* 95, 22103–22120. <https://doi.org/10.1029/JC095iC12p22103>
- 889 Jouanno, J., Marin, F., Du Penhoat, Y., Sheinbaum, J., & Molines, J. M., 2011. Seasonal  
890 heat balance in the upper 100 m of the equatorial Atlantic Ocean. *Journal of*  
891 *Geophysical Research: Oceans*, 116(C9).
- 892 Kelly, S.M., Nash, J.D., Kunze, E., 2010. Internal-tide energy over topography. *Journal of*  
893 *Geophysical Research: Oceans* 115. <https://doi.org/10.1029/2009JC005618>
- 894 Koch-Larrouy, A., Lengaigne, M., Terray, P., Madec, G., Masson, S., 2010. Tidal mixing  
895 in the Indonesian Seas and its effect on the tropical climate system. *Clim Dyn* 34,  
896 891–904. <https://doi.org/10.1007/s00382-009-0642-4>
- 897 Koch-Larrouy, A., Madec, G., Iudicone, D., Atmadipoera, A., Molcard, R., 2008. Physical  
898 processes contributing to the water mass transformation of the Indonesian  
899 Throughflow. *Ocean Dynamics* 58, 275–288. <https://doi.org/10.1007/s10236-008-0154-5>
- 900
- 901 Koch-Larrouy, A., Madec, G., Bouruet-Aubertot, P., Gerkema, T., Bessières, L., Molcard,  
902 R., 2007. On the transformation of Pacific Water into Indonesian Throughflow Water

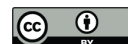

- 903 by internal tidal mixing. *Geophysical Research Letters* 34.  
904 <https://doi.org/10.1029/2006GL028405>
- 905 Kunze, E., MacKay, C., McPhee-Shaw, E.E., Morrice, K., Girton, J.B., Terker, S.R., 2012.  
906 Turbulent Mixing and Exchange with Interior Waters on Sloping Boundaries. *Journal*  
907 *of Physical Oceanography* 42, 910–927. <https://doi.org/10.1175/JPO-D-11-075.1>
- 908 Lambeck, K., Runcorn, S.K., 1977. Tidal dissipation in the oceans: astronomical,  
909 geophysical and oceanographic consequences. *Philosophical Transactions of the*  
910 *Royal Society of London. Series A, Mathematical and Physical Sciences* 287, 545–  
911 594. <https://doi.org/10.1098/rsta.1977.0159>
- 912 Lascaratos, A., 1993. Estimation of deep and intermediate water mass formation rates in  
913 the Mediterranean Sea. *Deep Sea Research Part II: Topical Studies in Oceanography*  
914 40, 1327–1332. [https://doi.org/10.1016/0967-0645\(93\)90072-U](https://doi.org/10.1016/0967-0645(93)90072-U)
- 915 Le Provost, C., Lyard, F., 1997. Energetics of the M2 barotropic ocean tides: an estimate  
916 of bottom friction dissipation from a hydrodynamic model - ScienceDirect. *Progress*  
917 *in Oceanography* 37–52.
- 918 Lellouche, J.-M., Greiner, E., Le Galloudec, O., Garric, G., Regnier, C., Drevillon, M.,  
919 Benkiran, M., Testut, C.-E., Bourdalle-Badie, R., Gasparin, F., Hernandez, O., Levier,  
920 B., Drillet, Y., Remy, E., Le Traon, P.-Y., 2018. Recent updates to the Copernicus  
921 Marine Service global ocean monitoring and forecasting real-time 1/12° high-  
922 resolution system. *Ocean Science* 14, 1093–1126. [https://doi.org/10.5194/os-14-](https://doi.org/10.5194/os-14-1093-2018)  
923 [1093-2018](https://doi.org/10.5194/os-14-1093-2018)
- 924 Lentini, C.A.D., Magalhães, J.M., da Silva, J.C.B., Lorenzetti, J.A., 2016. Transcritical  
925 Flow and Generation of Internal Solitary Waves off the Amazon River: Synthetic  
926 Aperture Radar Observations and Interpretation. *Oceanography* 29, 187–195.
- 927 Lentz, S.J., Limeburner, R., 1995. The Amazon River Plume during AMASSEDS: Spatial  
928 characteristics and salinity variability. *Journal of Geophysical Research: Oceans* 100,  
929 2355–2375. <https://doi.org/10.1029/94JC01411>
- 930 Li, C., Zhou, W., Jia, X., Wang, X., 2006. Decadal/interdecadal variations of the ocean  
931 temperature and its impacts on climate. *Adv. Atmos. Sci.* 23, 964–981.  
932 <https://doi.org/10.1007/s00376-006-0964-7>
- 933 Lyard, F.H., Allain, D.J., Cancet, M., Carrère, L., Picot, N., 2021. FES2014 global ocean  
934 tide atlas: design and performance. *Ocean Science* 17, 615–649.  
935 <https://doi.org/10.5194/os-17-615-2021>



- 936 Madec, G., Bourdallé-Badie, R., Chanut, J., Clementi, E., Coward, A., Ethé, C., Iovino,  
937 D., Lea, D., Lévy, C., Lovato, T., Martin, N., Masson, S., Mocavero, S., Rousset, C.,  
938 Storkey, D., Vancoppenolle, M., Müeller, S., Nurser, G., Bell, M., & Samson, G.,  
939 (2019). NEMO ocean engine. In Notes du Pôle de modélisation de l'Institut Pierre-  
940 Simon Laplace (IPSL) (v4.0, Number 27). Zenodo.  
941 <https://doi.org/10.5281/zenodo.3878122>
- 942 Madec, G. (2014), “NEMO ocean engine” (Draft edition r5171), *Note du Pôle de*  
943 *modélisation 27*, Inst. Pierre-Simon Laplace, France, ISSN No 1288-1619.
- 944 Magalhaes, J.M., da Silva, J.C.B., Buijsman, M.C., Garcia, C. a. E., 2016. Effect of the  
945 North Equatorial Counter Current on the generation and propagation of internal  
946 solitary waves off the Amazon shelf (SAR observations). *Ocean Science* 12, 243–  
947 255. <https://doi.org/10.5194/os-12-243-2016>
- 948 Mei, W., Xie, S.-P., Primeau, F., McWilliams, J.C., Pasquero, C., 2015. Northwestern  
949 Pacific typhoon intensity controlled by changes in ocean temperatures. *Science*  
950 *Advances* 1, e1500014. <https://doi.org/10.1126/sciadv.1500014>
- 951 Moisan, J.R., Niiler, P.P., 1998. The Seasonal Heat Budget of the North Pacific: Net Heat  
952 Flux and Heat Storage Rates (1950–1990). *Journal of Physical Oceanography* 28,  
953 401–421. [https://doi.org/10.1175/1520-0485\(1998\)028<0401:TSHBOT>2.0.CO;2](https://doi.org/10.1175/1520-0485(1998)028<0401:TSHBOT>2.0.CO;2)
- 954 Molinas, E., Carneiro, J.C., Vinzon, S., 2020. Internal tides as a major process in Amazon  
955 continental shelf fine sediment transport. *Marine Geology* 430, 106360.  
956 <https://doi.org/10.1016/j.margeo.2020.106360>
- 957 Muacho, S., da Silva, J.C.B., Brotas, V., Oliveira, P.B., 2013. Effect of internal waves on  
958 near-surface chlorophyll concentration and primary production in the Nazaré Canyon  
959 (west of the Iberian Peninsula). *Deep Sea Research Part I: Oceanographic Research*  
960 *Papers* 81, 89–96. <https://doi.org/10.1016/j.dsr.2013.07.012>
- 961 Muller-Karger, F.E., McClain, C.R., Richardson, P.L., 1988. The dispersal of the  
962 Amazon’s water. *Nature* 333, 56–59. <https://doi.org/10.1038/333056a0>
- 963 Munk, W., Wunsch, C., 1998. Abyssal recipes II: energetics of tidal and wind mixing.  
964 *Deep Sea Research Part I: Oceanographic Research Papers* 45, 1977–2010.  
965 [https://doi.org/10.1016/S0967-0637\(98\)00070-3](https://doi.org/10.1016/S0967-0637(98)00070-3)
- 966 Nagai, T., Hibiya, T., 2015. Internal tides and associated vertical mixing in the Indonesian  
967 Archipelago. *Journal of Geophysical Research : Oceans* 120, 3373–3390.  
968 <https://doi.org/10.1002/2014JC010592>



- 969 Neto, A.V.N., da Silva, A.C., 2014. Seawater temperature changes associated with the  
970 North Brazil current dynamics. *Ocean Dynamics* 64, 13–27.  
971 <https://doi.org/10.1007/s10236-013-0667-4>
- 972 Nittrouer, C.A., DeMaster, D.J., 1996. The Amazon shelf setting: tropical, energetic, and  
973 influenced by a large river. *Continental Shelf Research* 16, 553–573.  
974 [https://doi.org/10.1016/0278-4343\(95\)00069-0](https://doi.org/10.1016/0278-4343(95)00069-0)
- 975 Niwa, Y., Hibiya, T., 2014. Generation of baroclinic tide energy in a global three-  
976 dimensional numerical model with different spatial grid resolutions. *Ocean Modelling*  
977 80, 59–73. <https://doi.org/10.1016/j.ocemod.2014.05.003>
- 978 Niwa, Y., Hibiya, T., 2011. Estimation of baroclinic tide energy available for deep ocean  
979 mixing based on three-dimensional global numerical simulations. *J Oceanogr* 67,  
980 493–502. <https://doi.org/10.1007/s10872-011-0052-1>
- 981 Nugroho, D., Koch-Larrouy, A., Gaspar, P., Lyard, F., Reffray, G., Tranchant, B., 2018.  
982 Modelling explicit tides in the Indonesian seas: An important process for surface sea  
983 water properties. *Marine Pollution Bulletin, Special Issue: Indonesia seas*  
984 management 131, 7–18. <https://doi.org/10.1016/j.marpolbul.2017.06.033>
- 985 Peng, S., Liao, J., Wang, X., Liu, Z., Liu, Y., Zhu, Y., Li, B., Khokiattiwong, S., Yu, W.,  
986 2021. Energetics Based Estimation of the Diapycnal Mixing Induced by Internal  
987 Tides in the Andaman Sea. *Journal of Geophysical Research: Oceans* 126.  
988 <https://doi.org/10.1029/2020JC016521>
- 989 Pomar, L., Morsilli, M., Hallock, P., Bádenas, B., 2012. Internal waves, an under-explored  
990 source of turbulence events in the sedimentary record. *Earth-Science Reviews* 111,  
991 56–81. <https://doi.org/10.1016/j.earscirev.2011.12.005>
- 992 Richardson, P.L., Hufford, G.E., Limeburner, R., Brown, W.S., 1994. North Brazil Current  
993 retroflection eddies. *Journal of Geophysical Research: Oceans* 99, 5081–5093.  
994 <https://doi.org/10.1029/93JC03486>
- 995 Rosenthal, Y., Boyle, E.A., Slowey, N., 1997. Temperature control on the incorporation  
996 of magnesium, strontium, fluorine, and cadmium into benthic foraminiferal shells  
997 from Little Bahama Bank: Prospects for thermocline paleoceanography. *Geochimica*  
998 *et Cosmochimica Acta* 61, 3633–3643. [https://doi.org/10.1016/S0016-](https://doi.org/10.1016/S0016-7037(97)00181-6)  
999 [7037\(97\)00181-6](https://doi.org/10.1016/S0016-7037(97)00181-6)
- 1000 Ruault, V., Jouanno, J., Durand, F., Chanut, J., Benschila, R., 2020. Role of the Tide on the  
1001 Structure of the Amazon Plume: A Numerical Modeling Approach. *Journal of*



- 1002 Geophysical Research: Oceans 125, e2019JC015495.  
1003 <https://doi.org/10.1029/2019JC015495>
- 1004 Salamina, G.G., Whinney, J.C., Heron, S.F., Ridd, P.V., 2021. Internal tidal waves and  
1005 deep-water renewal in a tropical fjord: Lessons from Ambon Bay, eastern Indonesia.  
1006 Estuarine, Coastal and Shelf Science 253, 107291.  
1007 <https://doi.org/10.1016/j.ecss.2021.107291>
- 1008 Schott, F.A., Dengler, M., Brandt, P., Affler, K., Fischer, J., Bourlès, B., Gouriou, Y.,  
1009 Molinari, R.L., Rhein, M., 2003. The zonal currents and transports at 35°W in the  
1010 tropical Atlantic. Geophysical Research Letters 30.  
1011 <https://doi.org/10.1029/2002GL016849>
- 1012 Sharples, J., Tweddle, J.F., Green, J.A.M., Palmer, M.R., Kim, Y.-N., Hickman, A.E.,  
1013 Holligan, P.M., Moore, C.M., Rippeth, T.P., Simpson, J.H., Krivtsov, V., 2007.  
1014 Spring-neap modulation of internal tide mixing and vertical nitrate fluxes at a shelf  
1015 edge in summer. Limnology and Oceanography 52, 1735–1747.  
1016 <https://doi.org/10.4319/lo.2007.52.5.1735>
- 1017 Shriver, J., Arbic, B., Richman, J., Ray, R., Metzger, E., Wallcraft, A., Timko, P., 2012.  
1018 An evaluation of the barotropic and internal tides in a high-resolution global ocean  
1019 circulation model. Journal of Geophysical Research 117, C10024.  
1020 <https://doi.org/10.1029/2012JC008170>
- 1021 Smith, K.A., Rocheleau, G., Merrifield, M.A., Jaramillo, S., Pawlak, G., 2016.  
1022 Temperature variability caused by internal tides in the coral reef ecosystem of  
1023 Hanauma bay, Hawai‘i. Continental Shelf Research 116, 1–12.  
1024 <https://doi.org/10.1016/j.csr.2016.01.004>
- 1025 Speer, K.G., Isemer, H.-J., Biastoch, A., 1995. Water mass formation from revised  
1026 COADS data. Journal of Physical Oceanography 25, 2444–2457.
- 1027 Swift, J.H., Aagaard, K., 1981. Seasonal transitions and water mass formation in the  
1028 Iceland and Greenland seas. Deep Sea Research Part A. Oceanographic Research  
1029 Papers 28, 1107–1129. [https://doi.org/10.1016/0198-0149\(81\)90050-9](https://doi.org/10.1016/0198-0149(81)90050-9)
- 1030 Tchilibou, M., Koch-Larrouy, A., Barbot, S., Lyard, F., Morel, Y., Jouanno, J., Morrow,  
1031 R., 2022. Internal tides off the Amazon shelf during two contrasted seasons:  
1032 interactions with background circulation and SSH imprints. Ocean Science 18, 1591–  
1033 1618. <https://doi.org/10.5194/os-18-1591-2022>



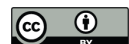

- 1034 Tchilibou, M., Gourdeau, L., Lyard, F., Morrow, R., Koch Larrouy, A., Allain, D., Djath,  
1035 B., 2020. Internal tides in the Solomon Sea in contrasted ENSO conditions. *Ocean*  
1036 *Science* 16, 615–635. <https://doi.org/10.5194/os-16-615-2020>
- 1037 Tchilibou, M., Gourdeau, L., Morrow, R., Serazin, G., Djath, B., Lyard, F., 2018. Spectral  
1038 signatures of the tropical Pacific dynamics from model and altimetry: a focus on the  
1039 meso-/submesoscale range. *Ocean Science* 14, 1283–1301.  
1040 <https://doi.org/10.5194/os-14-1283-2018>
- 1041 Tuerena, R.E., Williams, R.G., Mahaffey, C., Vic, C., Green, J.A.M., Naveira-Garabato,  
1042 A., Forryan, A., Sharples, J., 2019. Internal Tides Drive Nutrient Fluxes into the Deep  
1043 Chlorophyll Maximum Over Mid-ocean Ridges. *Global Biogeochemical Cycles* 33,  
1044 995–1009. <https://doi.org/10.1029/2019GB006214>
- 1045 Wallace, M.I., Meredith, M.P., Brandon, M.A., Sherwin, T.J., Dale, A., Clarke, A., 2008.  
1046 On the characteristics of internal tides and coastal upwelling behaviour in Marguerite  
1047 Bay, west Antarctic Peninsula. *Deep Sea Research Part II: Topical Studies in*  
1048 *Oceanography* 55, 2023–2040. <https://doi.org/10.1016/j.dsr2.2008.04.033>
- 1049 Wang, X., Peng, S., Liu, Z., Huang, R.X., Qian, Y.-K., Li, Y., 2016. Tidal Mixing in the  
1050 South China Sea: An Estimate Based on the Internal Tide Energetics. *Journal of*  
1051 *Physical Oceanography* 46, 107–124. <https://doi.org/10.1175/JPO-D-15-0082.1>
- 1052 Wentz, F.J., C. Gentemann, K.A. Hilburn, 2015: Remote Sensing Systems TRMM TMI  
1053 [indicate whether you used Daily, 3-Day, Weekly, or Monthly] Environmental Suite  
1054 on 0.25 deg grid, Version 7.1, [indicate subset if used]. Remote Sensing Systems,  
1055 Santa Rosa, CA. Available online at [www.remss.com/missions/tmi](http://www.remss.com/missions/tmi).
- 1056 Xie, S.-P., Carton, J.A., 2004. Tropical Atlantic variability: Patterns, mechanisms, and  
1057 impacts. Washington DC American Geophysical Union Geophysical Monograph  
1058 Series 147, 121–142. <https://doi.org/10.1029/147GM07>
- 1059 Xu, P., Yang, W., Zhu, B., Wei, H., Zhao, L., Nie, H., 2020. Turbulent mixing and vertical  
1060 nitrate flux induced by the semidiurnal internal tides in the southern Yellow Sea.  
1061 *Continental Shelf Research* 208, 104240. <https://doi.org/10.1016/j.csr.2020.104240>
- 1062 Yadidya, B., Rao, A.D., 2022. Projected climate variability of internal waves in the  
1063 Andaman Sea. *Commun Earth Environ* 3, 1–12. [https://doi.org/10.1038/s43247-022-](https://doi.org/10.1038/s43247-022-00574-8)  
1064 [00574-8](https://doi.org/10.1038/s43247-022-00574-8)

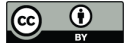

- 1065 Zaron, E.D., 2019. Baroclinic Tidal Sea Level from Exact-Repeat Mission Altimetry.  
1066 Journal of Physical Oceanography 49, 193–210. [https://doi.org/10.1175/JPO-D-18-](https://doi.org/10.1175/JPO-D-18-0127.1)  
1067 [0127.1](https://doi.org/10.1175/JPO-D-18-0127.1)
- 1068 Zaron, E.D., 2017. Mapping the nonstationary internal tide with satellite altimetry. Journal  
1069 of Geophysical Research: Oceans 122, 539–554.  
1070 <https://doi.org/10.1002/2016JC012487>
- 1071 Zhao, Z., Alford, M.H., Girton, J.B., Rainville, L., Simmons, H.L., 2016. Global  
1072 Observations of Open-Ocean Mode-1 M2 Internal Tides. Journal of Physical  
1073 Oceanography 46, 1657–1684. <https://doi.org/10.1175/JPO-D-15-0105.1>
- 1074 Zhao, Z., Alford, M.H., Girton, J.B., 2012. Mapping Low-Mode Internal Tides from  
1075 Multisatellite Altimetry. Oceanography 25, 42–51.
- 1076  
1077  
1078  
1079  
1080  
1081  
1082  
1083  
1084  
1085  
1086  
1087  
1088  
1089  
1090  
1091  
1092  
1093  
1094  
1095  
1096  
1097

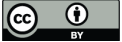

*The Slope of the model Bathymetry*

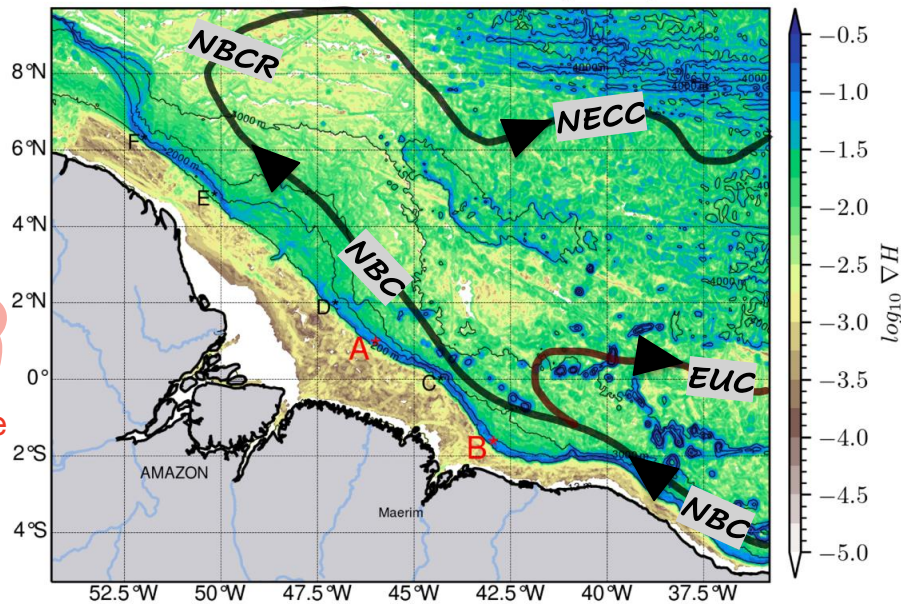

Generation site letters A to F are hard to read, especially the black ones

1098

1099

1100

1101

1102

1103

1104

1105

1106

1107

1108

1109

1110

1111

1112

Figure 1: The horizontal gradient ( $\nabla H$ ) of the model's bathymetry with different internal tide generation sites ( $A^*$ ,  $B^*$ ,  $C^*$ ,  $D^*$ ,  $E^*$  and  $F^*$ ) along the high slope (blue) of the shelf break, with the main sites (in red) being  $A^*$  and  $B^*$ , as mentioned in Magalhaes et al. (2016) and Tchilibou et al. (2022). Solid lines represent the circulation  $\chi$  as described by Didden and Schott, 1993; Richardson et al., 1994; Bourlès et al., 1999a; Johns et al., 1998; Schott et al., 2003; Garzoli et al., 2004 with NBC, NBCR and NECC pathways in black, and the EUC pathway in brown red. Tin black contours are 200 m, 2000 m, 3000 m and 4000 m isobaths.

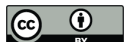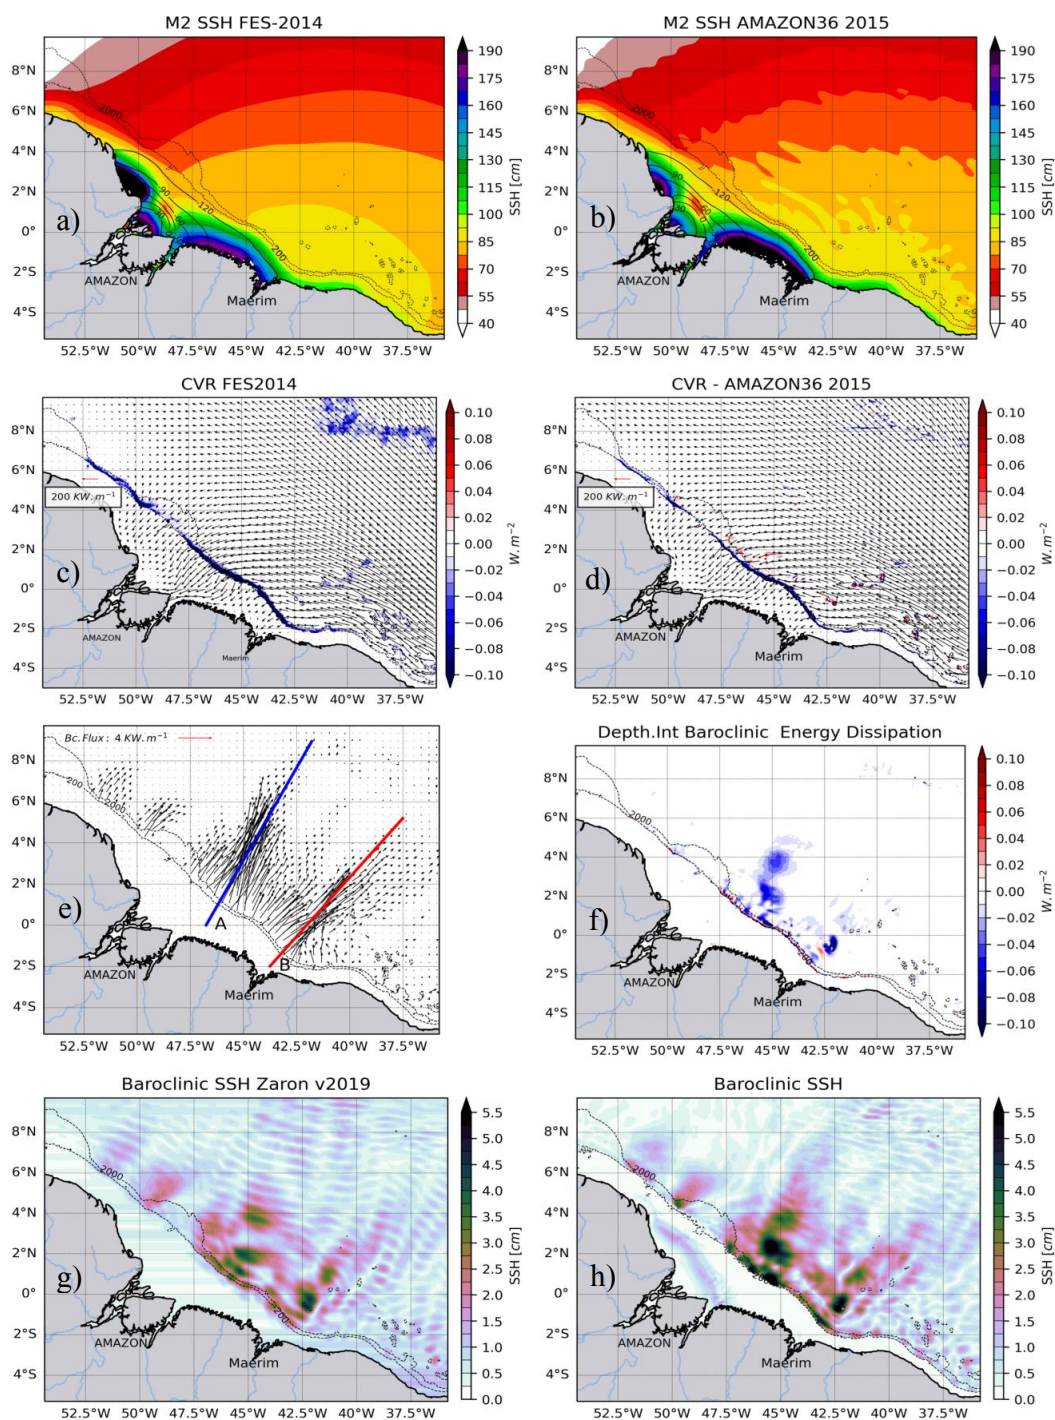

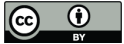

1114 *Figure 2: M2 tides (coherent) characteristics. Barotropic sea surface height for FES2014 (a)*  
1115 *and model (b), depth-integrated energy conversion rate (CVR) (color shading) for FES2014*  
1116 *(c) and model (d) with barotropic energy flux black arrows, model depth-integrated baroclinic*  
1117 *energy flux black (e) arrows with transect lines along A (blue) and B (red) IT's pathways,*  
1118 *model depth-integrated baroclinic energy dissipation (f), and baroclinic sea surface height*  
1119 *from observation (Zaron, 2019) (g) and model (h).*

1120

1121

1122

1123

1124

1125

1126

1127

1128

1129

1130

1131

1132

1133

1134

1135

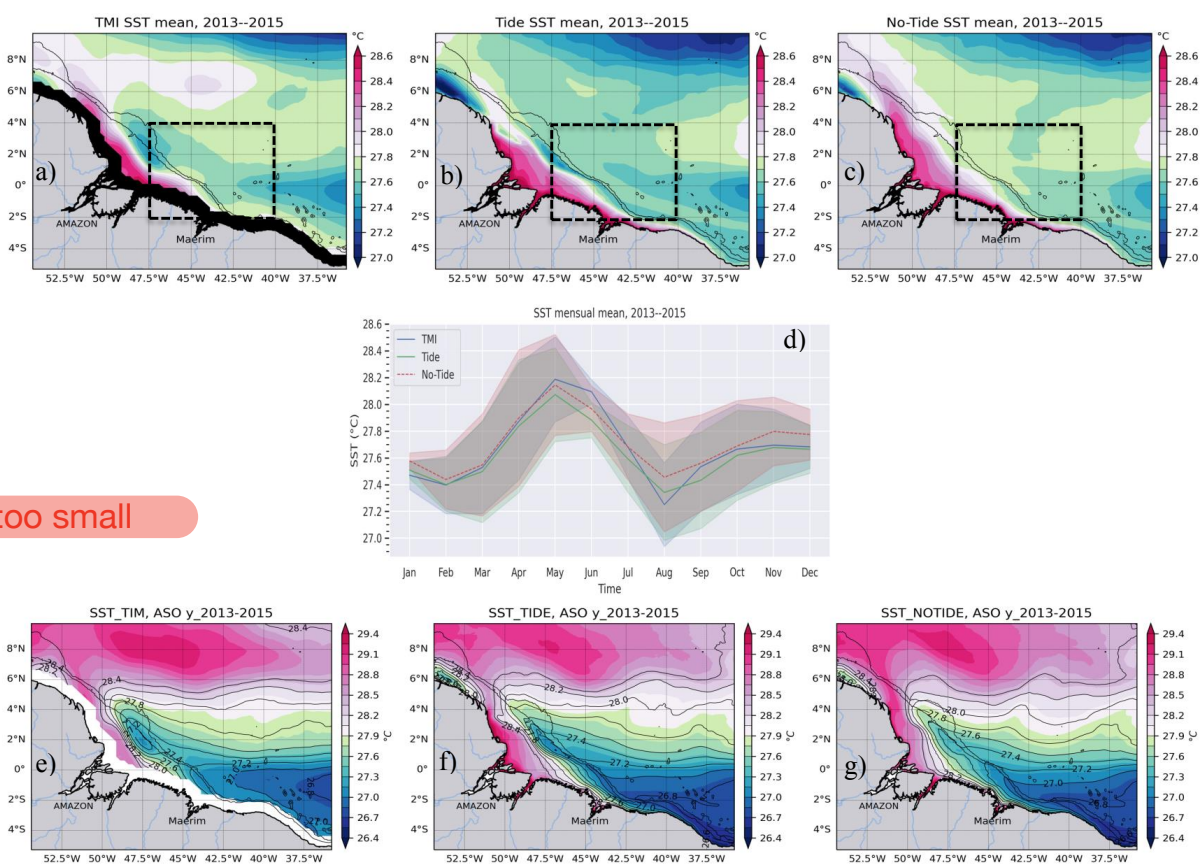

Fonts are too small



1137 *Figure 3: Mean SST for the period 2013 to 2015 from TMI SST (a) with a black coastal mask,*  
1138 *the model's tidal simulation (b), the model's non-tidal simulation (c), seasonal cycle of the SST*  
1139 *of the three products averaged inside the dotted line box (covering IT pathways emanating*  
1140 *from the main generation sites A and B) with shelf masked over the 200 m isobath, the bands*  
1141 *give the variability according to standard deviation (d). The lower panels present the SST*  
1142 *averaged for the ASO (August-September-October) season over the years 2013–2015 for TMI*  
1143 *SST (e) with a white coastal mask, the model's tidal simulation (f) and the model's non-tidal*  
1144 *simulation (g), with the white thin lines representing the temperature contours. The black tin*  
1145 *lines stand for the 200 m and 2000 m isobaths.*

1146

1147

1148

1149

1150

1151

1152

1153

1154

1155

1156

1157

1158

1159

1160

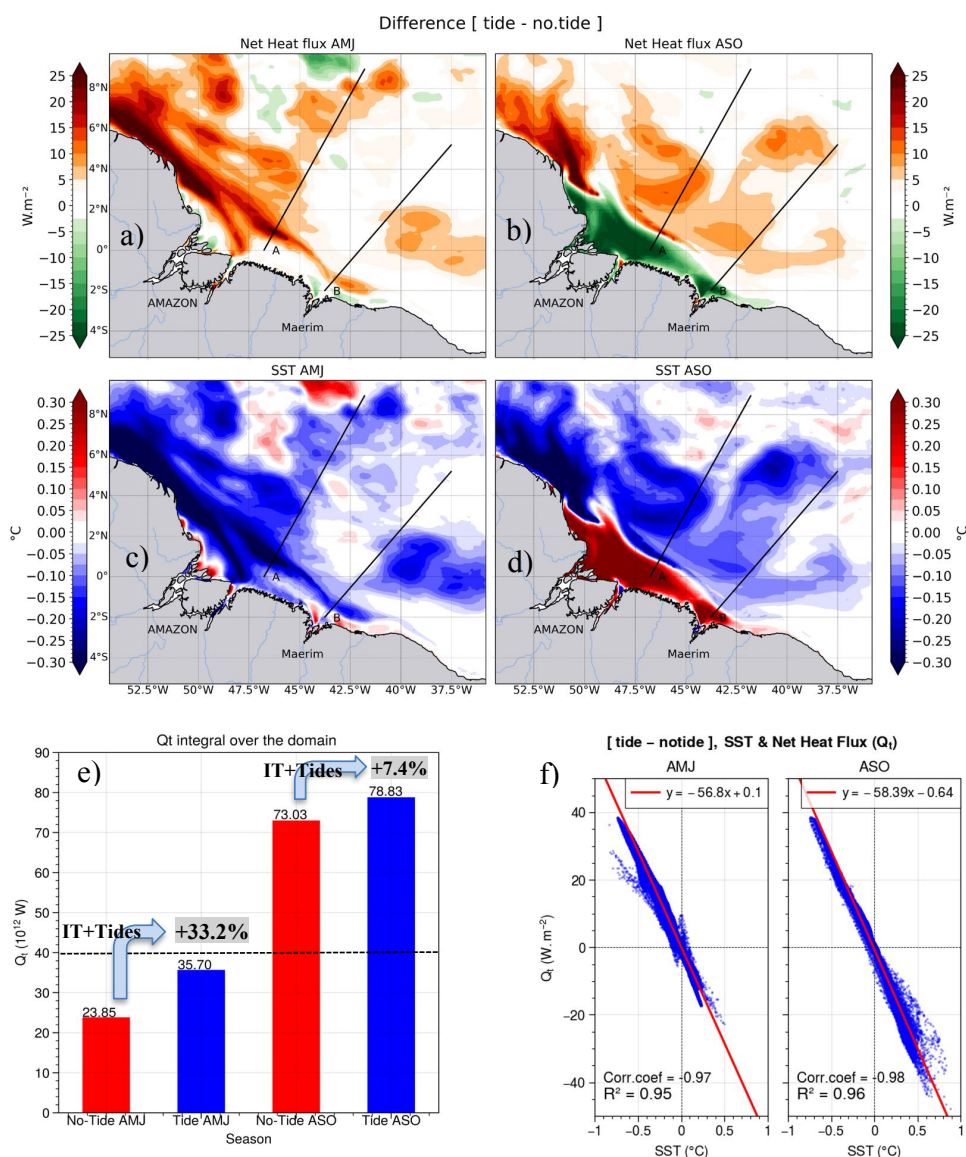

1161

1162 *Figure 4: Relationship between the atmosphere-to-ocean net heat flux ( $Q_t$ ) and the SST: the  $Q_t$*   
 1163 *difference between tide and no-tide simulations in AMJ (a) and ASO (b) season, and SST*  
 1164 *difference in AMJ (c) and ASO (d), domain integrated  $Q_t$  (e) for both seasons for each*  
 1165 *simulation. Correlation between  $Q_t$  difference and SST difference for each season (f).*

1166

1167

1168



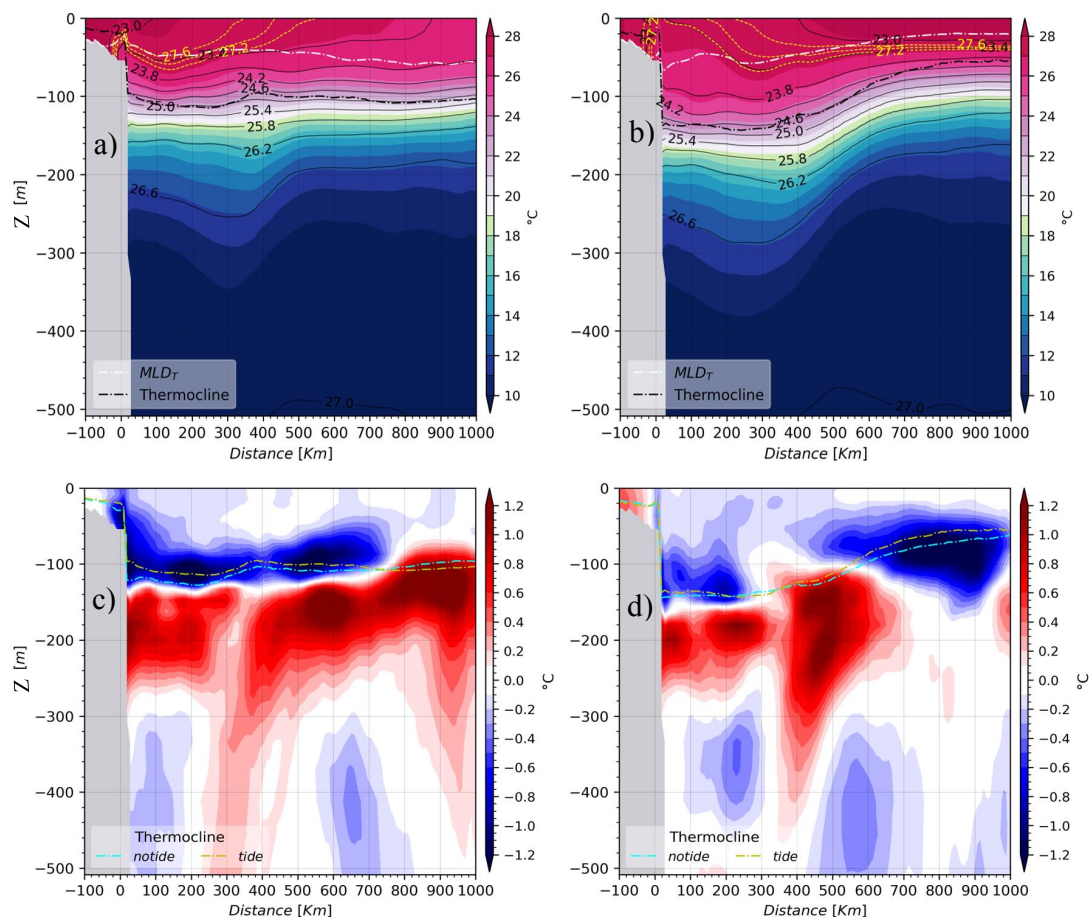

1169

1170 *Figure 5: Vertical sections of tidal simulation's temperature following IT's pathway A for the*  
 1171 *AMJ (a) and ASO (b) seasons. Difference of temperature between tidal and non-tidal*  
 1172 *simulations for AMJ (c) and ASO (d) seasons. The yellow dotted and black tin lines in the upper*  
 1173 *panels are, respectively, for temperature and density anomaly isocontours, the black and white*  
 1174 *ticker dot-dashed lines are respectively thermocline and mixed layer depths. The yellow and*  
 1175 *cyan ticker dot-dashed lines in the lower panel are the thermocline depth respectively for tidal*  
 1176 *and non-tidal simulations.*

1177

1178

1179



What's this???

Authors state earlier that paths A and B are similar, but they look very different here, especially in panel (b).

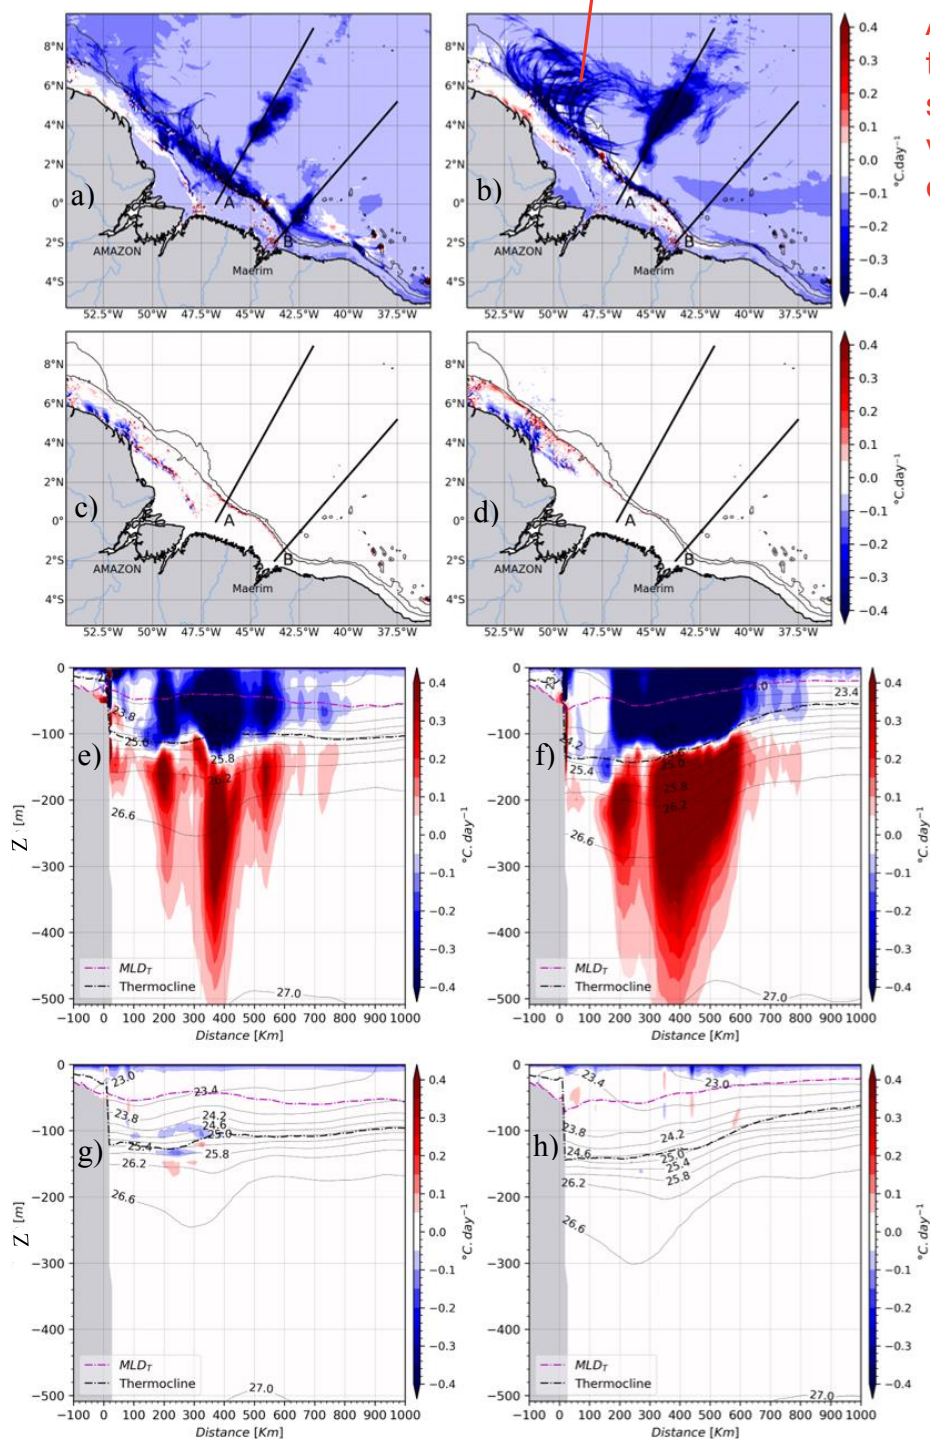

1180

1181 *Figure 6: The vertical diffusion of temperature (ZDF) for both seasons, respectively AMJ (left*



1182 *panel) and ASO (right panel). Vertical mean between 2–20 m for AMJ season in tidal (a) and*  
1183 *non-tidal (c) simulation; then for ASO season in tidal (b) and non-tidal (d) simulations. Black*  
1184 *thin contours are, from the coast to open ocean, 200 m and 2000 m isobaths. Vertical section*  
1185 *following A for AMJ season in tidal (e) and non-tidal (g) simulations; then for ASO season in*  
1186 *tidal (f) and no-tidal (h) simulation. The black and magenta ticker dot-dashed lines are*  
1187 *respectively thermocline depth and mixed layer depth. Thin black contours are for density*  
1188 *anomaly.*

1189

1190

1191

1192

1193

1194

1195

1196

1197

1198

1199

1200

1201

1202

1203

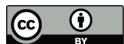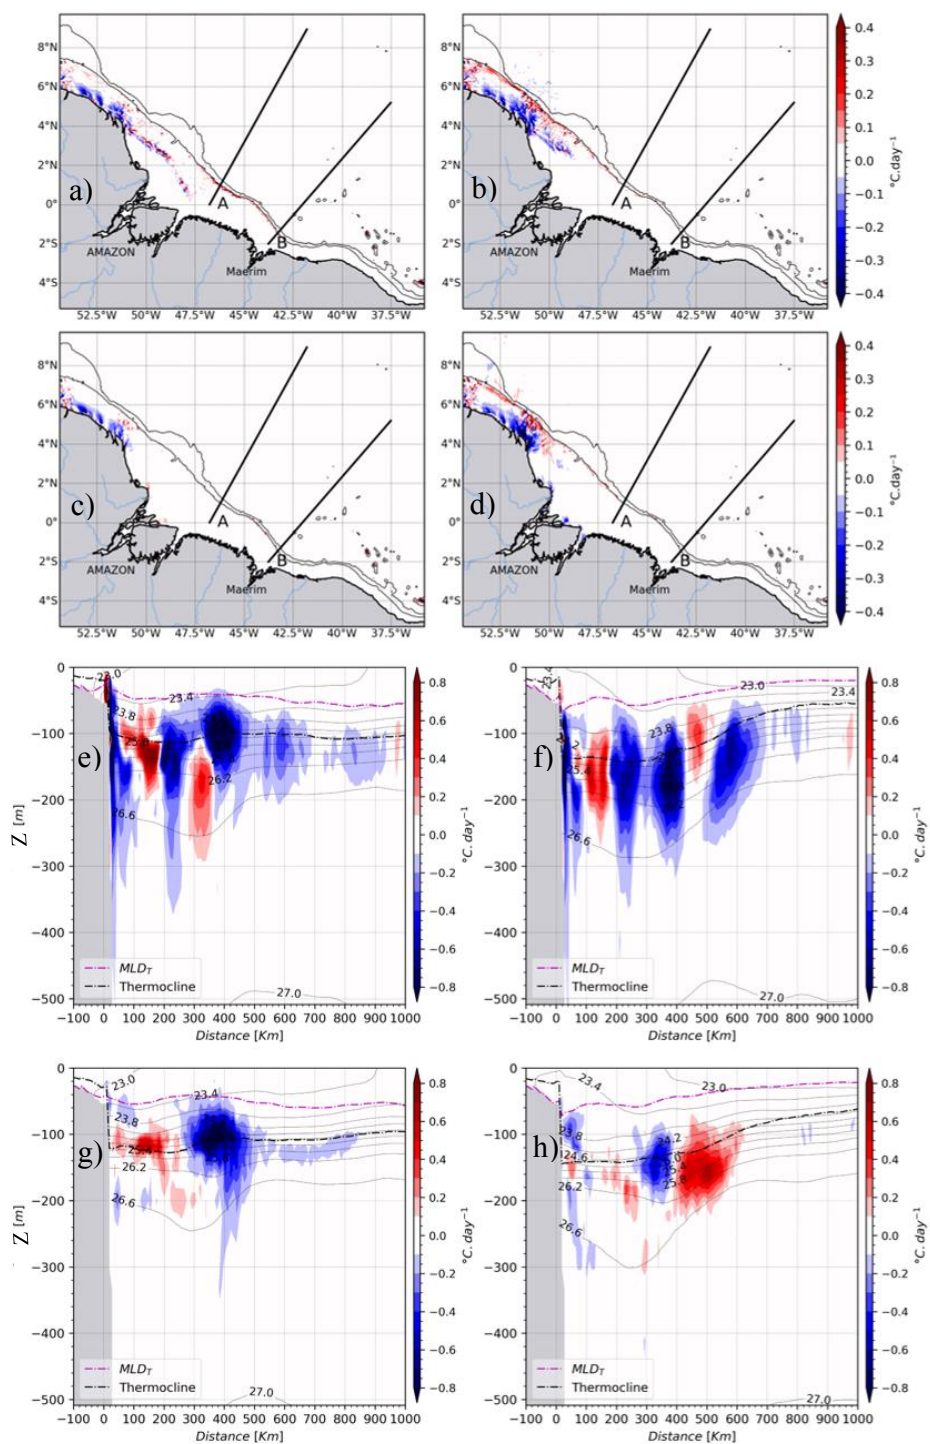

1204

1205 *Figure 7: same as figure 6, but for the vertical advection of temperature ( $z$ -ADV).*

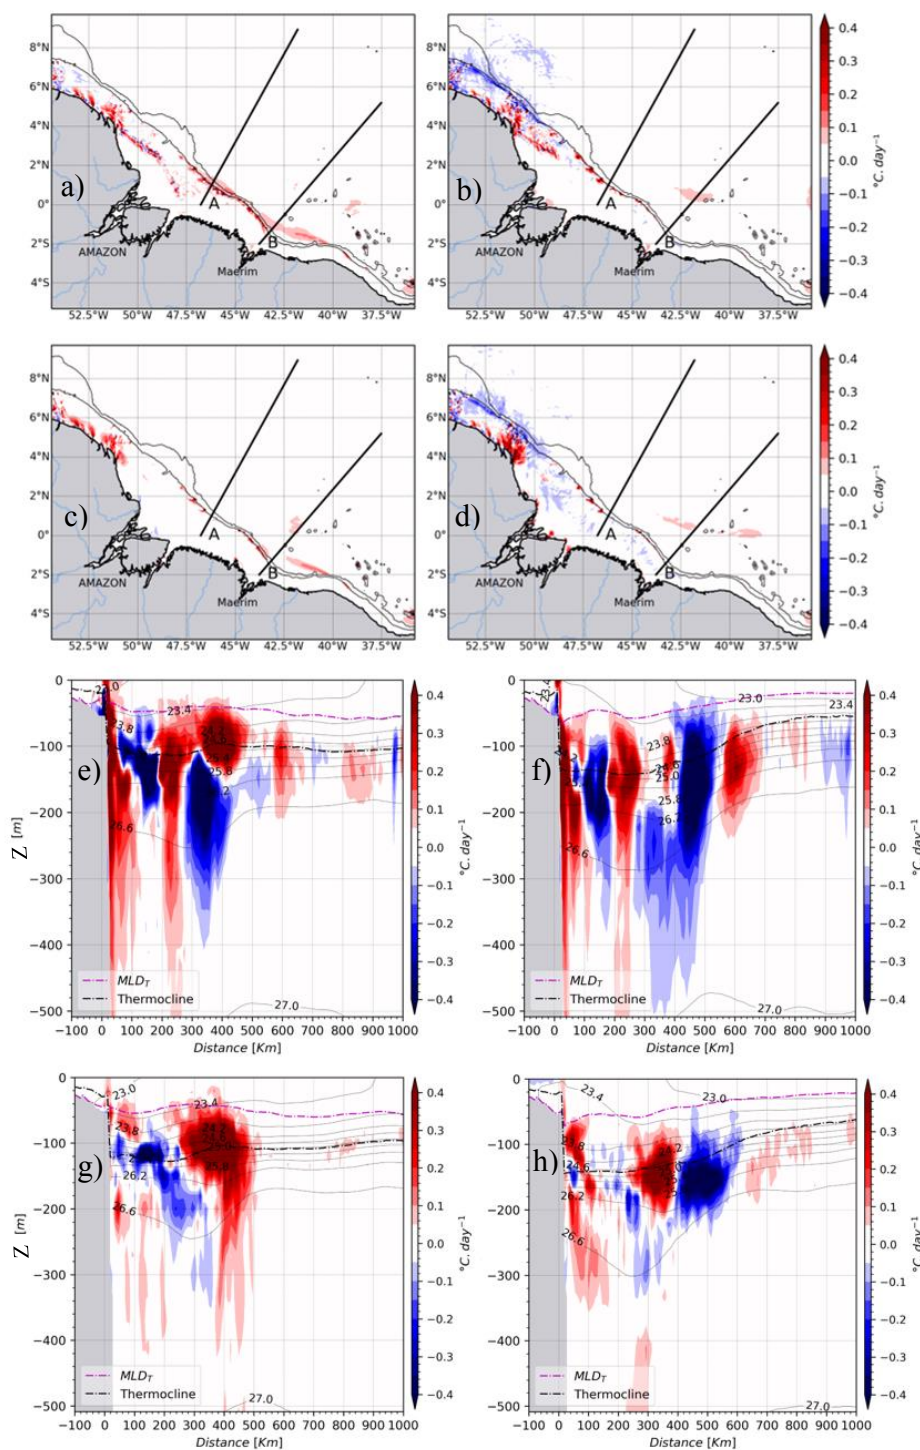

1206

1207 *Figure 8: same as figure 6 but for the horizontal advection of temperature ( $h\text{-ADV} = x\text{-ADV}$ )*

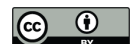

1208  $+ y-ADV$ ).

1209

1210

1211

1212

1213

1214

1215

1216

1217

1218

1219

1220

1221

1222

1223

1224

1225

1226

1227

1228

1229

1230

1231

1232

1233

1234

1235

1236

1237

1238

1239

1240
